# How are age-related difference in sleep quality associated with health outcomes? An epidemiological investigation in a UK cohort of 2406 adults

Andrew Gadie<sup>1</sup>

Meredith Shafto<sup>2</sup>

Yue Leng<sup>3</sup>

Cam-CAN<sup>4</sup>

Rogier A. Kievit<sup>1\*</sup>

\*Corresponding author: [rogier.kievit@mrc-cbu.cam.ac.uk](mailto:rogier.kievit@mrc-cbu.cam.ac.uk)

1 MRC Cognition and Brain Sciences Unit, 15 Chaucer Rd, Cambridge, CB2 7EF, United Kingdom

2 Department of Psychology, University of Cambridge, Downing Street, Cambridge, CB2 3EB, United Kingdom

3 University of California, San Francisco

4 Cambridge Centre for Ageing and Neuroscience (Cam-CAN), University of Cambridge and MRC Cognition and Brain Sciences Unit, Cambridge, UK, [www.cam-can.com](http://www.cam-can.com)

## Abstract

**Objectives** To examine age related differences in self-reported sleep quality and their associations with health outcomes across four domains: Physical Health, Cognitive Health, Mental Health and Neural Health.

**Setting** Cam-CAN is a cohort study in East Anglia/England, which collected self-reported health and lifestyle questions as well as a range of objective measures from healthy adults.

**Participants** 2406 healthy adults (age 18-98) answered questions about their sleep quality (Pittsburgh Sleep Quality Index) and measures of Physical, Cognitive, Mental, and Neural Health. A subset of 641 individuals provided measures of brain structure.

**Main outcome measures** Pittsburgh Sleep Quality Index scores (PSQI) of sleep, and scores across tests within the four domains of health. Latent Class Analysis (LCA) is used to identify sleep types across the lifespan. Bayesian regressions quantify the presence, and absence, of relationships between sleep quality and health measures.

**Results** Better sleep is generally associated with better health outcomes, strongly so for mental health, moderately for cognitive and physical health, but not for sleep quality and neural health. Latent Class Analysis identified four sleep types: 'Good sleepers' (68.6%, most frequent in middle age), 'inefficient sleepers' (13.05%, most frequent in old age), 'Delayed sleepers' (9.76%, most frequent in young adults) and 'poor sleepers' (8.6%, most frequent in old age). There is little evidence for interactions between sleep quality and age on health outcomes. Finally, we observe U-shaped associations between sleep duration and mental health (depression and anxiety) as well as self-reported general health, such that both short and long sleep were associated with poorer outcomes.

**Conclusions** Lifespan changes in sleep quality are multifaceted and not captured well by summary measures, but instead as partially independent symptoms that vary in prevalence across the lifespan. Better self-reported sleep is associated with better health outcomes, and the strength

of these associations differs across health domains. Notably, we do observed associations between self-reported sleep quality and white matter.

**Funding** Biotechnology and Biological Sciences Research Council (grant number BB/H008217/1). RAK is supported by the Wellcome Trust (grant number 107392/Z/15/Z and the UK Medical Research Council (MC-A060-5PR61).

## Keywords

Ageing, sleep quality, healthy ageing, cognition, mental health, cognition, white matter, physical health

## Strengths and limitations of this study

- Broad phenotypic assessment of healthy ageing across multiple health domains
- Advanced analytic techniques (i.e. Latent Class Analysis regression) allows new insights
- A uniquely large neuroimaging sample combined with Bayesian inference allows for quantification of evidence for the null hypothesis
- Subjective sleep measures may have drawbacks in older samples
- Cross-sectional data precludes modelling of within subject changes

## BACKGROUND

Sleep is a fundamental human behaviour, with humans spending almost a third of their lives asleep. Regular and sufficient sleep has been shown to benefit human physiology through a number of different routes, ranging from consolidation of memories (1) to removal of free radicals (2) and neurotoxic waste (3). Sleep patterns are known to change across the lifespan in various ways, including decreases in quantity and quality of sleep (4), with up to 50% of older adults report difficulties initiating and/or maintaining sleep (5). A meta-analysis of over 65 studies reflecting 3577 subjects across the lifespan reported a complex pattern of changes, including an increase of stage 1 but a decrease of stage 2 sleep in old age, as well as a decrease in REM sleep (6). An epidemiological investigation of self-reported sleep in older adults observed marked sex differences in age-related sleep changes, with females more likely to report disturbed sleep onset but men reporting night-time awakenings (7). Other findings age-related physiological changes in the alignment of homeostatic and circadian rhythms (8), decreases in sleep efficiency (9) the amount of slow-wave sleep, and an increase in daytime napping (10). Importantly, interruption and loss of sleep has been shown to have wide ranging adverse effects on health (11), leaving open the possibility that age-related changes in sleep patterns and quality may contribute to well-documented age-related declines in various health domains.

In the current study, we examine self-reported sleep habits in a large, population-based cohort Cambridge Centre for Ageing and Neuroscience (Cam-CAN (12)). We relate sleep measures to measures of health across four health domains: cognitive, brain health, physical and mental health. Our goal is to quantify and compare the associations between typical age-related changes in sleep quality and a range of measures of health measures that commonly decline in later life. We assess sleep using a self-reported measure of sleep quality, the Pittsburgh Sleep Quality Index (PSQI) (13). The PSQI has good psychometric properties (14) and has been shown to correlate reliably with diseases of aging and mortality (15–17). Although polysomnography (18) is commonly considered the gold standard of sleep quality measurement, it is often prohibitively challenging to employ in

large samples. A recent direct comparison of sleep measures (19) suggests that although subjective sleep measures (such as PSQI) may have certain drawbacks in older samples, they also capture complementary aspects of sleep quality not fully captured by polysomnography. Moreover, collecting self-report sleep quality data in a large, deeply phenotyped cohort offers several additional benefits.

By utilising a population cohort of healthy adults, and studying a range of health outcomes in the same population, we can circumvent challenges associated with studying clinical populations and provide new insights. First and foremost, by investigating associations between sleep and outcomes across multiple health domains in the same sample, we can make direct comparisons of the relative magnitude of these effects. Second, larger samples allow us to generate precise effect size estimates, as well as adduce in favour of the null hypothesis. Third, we investigate the associations between sleep quality and neural health in a uniquely large healthy population. Previous investigations of the consequences of poor sleep on especially neural health have generally focuses on clinical populations such as those suffering from insomnia (20,21). Although such studies are crucial for understanding pathology, the demographic idiosyncrasies and often modest sample sizes of these approaches make it hard to generalize to healthy, community dwelling lifespan populations. Moreover, most studies that study age-related changes or differences focus on (very) old age, while far less is known about young and middle aged adults (6). For these reasons, our focus on a healthy, multimodal lifespan cohort is likely to yield novel insights into the subtle changes in sleep quality across the lifespan.

We will focus on three questions within each health domain: First, is there a relationship between sleep quality and health? Second, does the strength and nature of this relationship change when age is included as a covariate? Third, does the strength and nature of the relationship change across the lifespan? We will examine these questions across each of the four health domains.

## METHODS

### Sample

A cohort of 2544 (12) was recruited as part of the population-based Cambridge Centre for Ageing and Neuroscience (Cam-CAN) cohort ([www.cam-can.com](http://www.cam-can.com)), drawn from the general population via Primary Care Trust (PCT)'s lists within the Cambridge City (UK) area 10,520 invitation letters were sent between 2010 and 2012, and willing participants were invited to have an interview conducted in their home, with questions on health, lifestyle demographics and core cognitive assessments. Sample size was chosen to allow for 100 participants per decile in further acquisition stages, giving sufficient power to separate age-related change from other sources of individual variation. For additional details of the project protocol see (12,22) and for further details of the Cam-CAN dataset visit <http://www.mrc-cbu.cam.ac.uk/datasets/camcan/>. A further subset of participants who were MRI compatible with no serious cognitive impairment participated in a neuroimaging session (22) between the 2011 and 2013. Participants included were native English speakers, had normal or corrected to normal vision and hearing, scored 25 or higher on the mini mental state (23). Note that other, more stringent cut-offs are sometimes employed to screen for premorbid dementia, such as a score of 88 or higher in the Addenbrookes Cognitive Examination – Revised (24). For the sake of comprehensiveness we repeated our analyses using this more stringent cut off (ACE-R>88), but observed no noteworthy differences in our findings, so we only report the findings based on the MMSE. Ethical approval for the study was obtained from the Cambridgeshire 2 (now East of England-Cambridge Central) Research Ethics Committee (reference: 10/H0308/50). Participants gave written informed consent. The raw data and analysis code are available upon signing a data sharing request form (see <http://www.mrc-cbu.cam.ac.uk/datasets/camcan/> for more detail).

## Variables

### *Sleep Measures*

Sleep quality was assessed using the Pittsburgh Sleep Quality Index (PSQI), a well-validated self-report questionnaire (13,19) designed to assist in the diagnosis of sleep disorders. The questions concern sleep patterns, habits, and lifestyle questions, grouped into seven components, each yielding a score ranging from 0 (good sleep/no problems) to 3 (poor sleep/severe problems), that are commonly summed to a PSQI Total score ranging between 0 and 21, with higher scores reflecting poorer sleep quality.

### Health Measures

*Cognitive health.* A number of studies have found associations between poor sleep and cognitive decline, including in elderly populations. Poor sleep affects cognitive abilities such as executive functions (25) and learning and memory processes (26), whereas short term pharmaceutical interventions such as administration of melatonin improve both sleep quality and cognitive performance (27,28). Recent work (29) concluded that “maintaining good sleep quality, at least in young adulthood and middle age, promotes better cognitive functioning and serves to protect against age-related cognitive declines”. As sleep may affect various aspects of cognition differently (30), we include measures that cover a range of cognitive domains including memory, reasoning, response speed, and verbal fluency, as well as including a measure of general cognition (See Table 1 and (12) for more details).

*Neural health.* Previous research suggests that individuals with a severe disruption of sleep are significantly more likely to exhibit signs of poor neural health (20,31). Specifically, previous studies have observed decreased white matter health in clinical populations suffering from conditions such as chronic insomnia (21), obstructive sleep apnoea (32,33), excessively long sleep in patients with diabetes (34), and REM Sleep Behaviour Disorder (35). Many of these studies focus on white matter hyperintensities (WMH), a measure of the total volume or number of (regions) showing low-level neural pathology (although some study grey matter, e.g. (36,37). White matter

hyperintensities are often used as a clinical marker, as longitudinal increases in WMHs are associated with increased risk of stroke, dementia and death (38) and are more prevalent in patients with pathological sleep problems (33,34). However, use of this metric in clinical cohorts largely leaves open the question of the impact of sleep quality on neural (white matter) health in non-clinical, healthy populations. To address this question, we use a more general indicator of white matter neural health; *Fractional Anisotropy* (FA). FA is associated with white matter integrity and myelination (39,40). We use FA as recent evidence suggests that WMHs represent the extremes (foci) of white matter damage, and that FA is able to capture the full continuum of white matter integrity (41). For more information regarding the precise white matter pipeline, see (12,22,42).

*Physical health.* Sleep quality is also an important marker for physical health, with poorer sleep being associated with conditions such as obesity, diabetes mellitus (43), overall health (11,44) and increased all-cause mortality (45,46). We focus on a set of variables that capture three types of health domains commonly associated with poor sleep: Cardiovascular health measured by pulse, systolic and diastolic blood pressure (47), self-reported health, both in general and for the past 12 months (48) and body-mass index (49).

*Mental health.* Previous work has found that disruptions of sleep quality are a central symptom of forms of psychopathology such as Major Depressive Disorder, including both hypersomnia and insomnia (44,50), and episodes of insomnia earlier greatly increased the risk of later episodes of major depression (51). Kaneita et al. (52) found a U-shaped association between sleep and depression, such that individuals regularly sleeping less than 6, or more than 8, hours were more likely to be depressed. Both depression (53) and anxiety (54,55) are commonly associated with sleep problems. To capture these dimensions we used both scales of the Hospital Anxiety and Depression Scale (HADS) (56), a widely used and standardized questionnaire that captures self-reported frequency and intensity of anxiety and depression symptoms.



| Health domain | Task and Description                                                                                                                                                                                              | Variable                                                            | Descriptives                                | Citation |
|---------------|-------------------------------------------------------------------------------------------------------------------------------------------------------------------------------------------------------------------|---------------------------------------------------------------------|---------------------------------------------|----------|
| Cognitive     | Story Recall Immediate: Participants hear a short story and are asked to recall as accurately as possible.                                                                                                        | Recall manually scored for similarity and precision (min=0, max=24) | N = 2379, M=13.14, SD=4.66, Range=(0-24)    | (57)     |
| Cognitive     | Story Recall Delayed: Same as above but recall after 30 minute delay                                                                                                                                              | Recall manually scored for similarity and precision (min=0, max=24) | N = 2366, M=11.47, SD=4.92, Range=(0-24)    | (57)     |
| Cognitive     | Letter Fluency (phonemic fluency): Participants have one minute to generate as many words as possible beginning with the letter 'p'.                                                                              | Total words generated (min=0,max=30 )                               | N = 2360, M=25.38, SD=3.96, Range=(0-30)    | (57)     |
| Cognitive     | Animal Fluency (semantic fluency): Participants have one minute to generate as many words as possible in the category 'animals'.                                                                                  | Total words generated (min=0,max=30)                                | N = 2346, M=25.85, SD=4.47, Range=(0-30)    | (57)     |
| Cognitive     | Cattell Culture Fair: Test of fluid reasoning using four subtests (series completions, odd-one-out, matrices and topology)                                                                                        | Total correct summed across four subtests. Min=0, max=46            | N = 658, M=31.8, SD=6.79, Range=(11-44)     | (58)     |
| Cognitive     | Simple reaction time: Speed in a simple reaction time task                                                                                                                                                        | 1/response time in seconds                                          | N = 657, M=0.37, SD=0.08, Range=(0.24-0.93) | (12)     |
| Cognitive     | Addenbrookes Cognitive Examination, Revised: Screening test for dementia using seven subtests (orientation, attention and concentration, memory, fluency, language, visuospatial abilities, perceptual abilities) | Performance on multiple tests converted to min=0, max=100 range     | N = 2406, M=89.25, SD=13.4, Range=(0-100)   | (24)     |
| Neural        | White matter health: Measure of tract integrity using fractional anisotropy                                                                                                                                       | Fractional Anisotropy (min=0, max=1, averaged across 10 tracts)     | N = 641, M=0.5, SD=0.03, Range=(0.3-0.56)   | (59)     |
| Physical      | Self-reported Health, in general: Participants use a 4-point scale to respond to the prompt "Would you say for someone of your age, your own health in general is..."                                             | Score from 1 = Excellent to 4= Poor                                 | N = 2404, M=2.02, SD=0.79, Range=(1-3)      | (60)     |
| Physical      | Self-reported Health, last 12 months: Participants use a 3-point scale to respond to the prompt "Over the last twelve months would                                                                                | Score from 1 = Good to 3= Poor                                      | N = 2398, M=1.46, SD=0.71, Range=(1-3)      | (60)     |

|               |                                                                                                                                                  |                                                                                       |                                                |      |
|---------------|--------------------------------------------------------------------------------------------------------------------------------------------------|---------------------------------------------------------------------------------------|------------------------------------------------|------|
|               | you say your health has on the whole been..."                                                                                                    |                                                                                       |                                                |      |
| Physical      | Systolic blood pressure                                                                                                                          | Mean systolic blood pressure in mmHg, averaged across three consecutive measurements  | N = 577, M=120.11, SD=17, Range=(78.5-186)     |      |
| Physical      | Diastolic blood pressure                                                                                                                         | Mean diastolic blood pressure in mmHg, averaged across three consecutive measurements | N = 577, M=73.14, SD=10.48, Range=(49-115.5)   |      |
| Physical      | Resting pulse                                                                                                                                    | Mean pulse in beats per minute, averaged across three consecutive measurements        | N = 578, M=65.69, SD=10.5, Range=(40-110.5)    |      |
| Physical      | Body Mass Index (BMI)                                                                                                                            | (weight in kg) / (height in m) <sup>2</sup>                                           | N = 584, M=25.77, SD=4.59, Range=(16.75-48.32) | (61) |
| Mental health | Anxiety Subscale (Hospital Anxiety and Depression Scale (HADS)): Participants response to seven questions about anxiety-related behaviours       | Seven questions rated on 0 to 3 scale ('Often' to 'Very seldom'). Min=0, Max=21       | N = 2393, M=5.17, SD=3.4, Range=(0-19)         | (56) |
| Mental health | Depression Subscale (Hospital Anxiety and Depression Scale (HADS)): Participants response to seven questions about depression-related behaviours | Seven questions rated on 0 to 3 scale ('Often' to 'Very seldom'). Min=0, Max=21       | N = 2373, M=3.32, SD=2.91, Range=(0-14)        |      |

186

Table 1. Description of health variables across each of four domains (cognitive, neural, physical, mental). For each variable details are given including a description of the task it is derived from, relevant citations, a brief definition and descriptive statistics.

## STATISTICAL ANALYSES

We examine whether self-reported sleep patterns change across the lifespan, both for the PSQI sum score and for each of the seven PSQI components. We then examine the relationships between the sleep quality and the four health domains in three ways: First, simple regression of the health outcome on sleep variables, to determine evidence for association between poor sleep quality and poor health outcomes. Second, we include age as a covariate. Finally, we include a (standard normal rescaled) continuous interaction term to examine whether there is evidence for a changing relationship between sleep and outcomes across the lifespan.

For all regressions we will use a default Bayesian approach advocated by (62–65) which avoids several well-documented issues with p-values (64), allows for quantification of null effects, and decreases the risk of multiple comparison problems (66). Bayesian regressions allows us to symmetrically quantify evidence in favour of, or against, some substantive model as compared to a baseline (e.g. null) model. This evidentiary strength is expressed as a Bayes Factor (67), which can be interpreted as the relative likelihood of one model versus another given the data and a certain prior expectation. A Bayes Factor of, e.g., 7, in favour of a regression model suggests that the data are seven times *more likely* under that model than an intercept only model for a given prior (for an empirical comparison of p-values and Bayes factors, see (65)). A heuristic summary of evidentiary interpretation can be seen in Figure 1.

We report log Bayes Factors for (very) large effects and regular Bayes Factors for smaller effects. To compute Bayes Factors we will use Default Bayes Factor approach for model selection (62,63) in the package BayesFactor (68) using the open source software package R (69). As previous papers report associations between sleep and outcomes ranging from absent to considerable in size we utilize the default, symmetric Cauchy prior with width  $\frac{\sqrt{2}}{2}$  which translates to a 50% confidence that the true effect will lie between -.707 and .707. Prior to further analysis, scores on all outcomes were transformed to a standard normal distribution, and any scores exceeding a z-score of 4 or -4 were recoded as missing (aggregate percentage outliers across the four health domains: Cognitive, 0.41%, Mental, 0.16%, Neural, 0.37% Physical, 0.031%).

| Bayes Factor BF <sub>10</sub> | Log BF <sub>10</sub> | Tileplot colour | Description (Jeffreys, 1961) |
|-------------------------------|----------------------|-----------------|------------------------------|
| >100                          | >4.6                 |                 | Extreme evidence for H1      |
| 30 – 100                      | 3.4 – 4.6            |                 | Very strong evidence for H1  |
| 10 – 30                       | 2.3 – 3.4            |                 | Strong evidence for H1       |
| 3 – 10                        | 1.098 – 2.3          |                 | Substantial evidence for H1  |
| 1 – 3                         | 1 – 1.098            |                 | Anecdotal evidence for H1    |
| 1                             | 0                    |                 | No evidence either way       |
| 1/3 – 1                       | -1.098 – -1          |                 | Anecdotal evidence for H0    |
| 1/3 - 1/10                    | -2.3 – -1.098        |                 | Substantial evidence for H0  |
| 1/10 - 1/30                   | -3.4 – -2.3          |                 | Strong evidence for H0       |
| 1/30 - 1/100                  | -4.6 – -3.4          |                 | Very strong evidence for H0  |
| <1/100                        | < -4.6               |                 | Extreme evidence for H0      |

**Figure 1.** Descriptive interpretation of Bayes Factors

## RESULTS

### Age-related differences in sleep quality

First, we examined sleep changes across the lifespan by examining age-related differences in the PSQI sum score (N= 2178, M=5.16, SD=3.35, Range=0-19). Regressing the PSQI global score on age, (see Supplementary Figure 1) showed evidence for a positive relationship across the lifespan (logBF<sub>10</sub>= 10.45). This suggests that on the whole, sleep quality decreases across the lifespan (note

that *higher* PSQI scores correspond to worse sleep). Although we observe strong statistical evidence for an age-related difference ('Extreme' according to (70)) age explained only 1.11 % of the variance in the PSQI Total score. Next, we examined each of the seven components on age in the same manner. In Supplementary Figure 2 we see that that age has varying and specific effects on different aspects of sleep quality, and did not worsen uniformly across the lifespan. For example, we observed moderate evidence that sleep latency did not change across the lifespan (Sleep Latency,  $BF_{01} = 9.66$ , in favour of the null), Sleep Quality showed no evidence for either change or stasis ( $BF_{10} = 1.64$ ) and one sleep component, Daytime Dysfunction, improved slightly across the lifespan ( $BF_{10} = 7.04$ ). Medication). The strongest age-related decline is that of Efficiency, showing an R-squared of 6.6%.

Finally, we entered all seven components into a Bayesian multiple regression simultaneously, to examine to what extent they could, together, predict age. The best model included every component except Sleep Duration ( $\log BF_{10} = 142.98$ ). Interestingly, this model explained 13.66% of the variance in age, compared to 1.12% for the PSQI Total score, and 6.6% for the strongest single component (efficiency). This shows that lifespan changes in self-reported sleep are heterogeneous and partially independent, and that specific patterns and components need to be taken into account simultaneously to fully understand age-related differences in sleep quality. These finding shows that neither the PSQI sum score nor the sleep components in isolation fully capture differences in sleep quality across the lifespan.

The analysis above suggests that conceptualizing 'poor sleep' as a single dimension does not reflect the subtleties in lifespan changes – An often computed sumscore changes little across the lifespan, whereas the totality of sleep symptoms shows far stronger, and more subtle, patterns. To better elucidate individual differences in sleep quality we next use *Latent Class Analysis* (71). This technique will allow us examine individual differences in sleep quality across the lifespan in more detail than afforded by simple linear regressions: Rather than examining continuous variation in sleep components, LCA classifies individuals into different *sleep types*, each associated with a distinct

profile of 'sleep symptoms'. If there are specific constellations of sleep problems across individuals, we can quantify and visualize such sleep types.

To analyse the data in this manner, we binarized the responses on each component into 'good' (0 or 1) or 'poor' (2 or 3). Our measures of PSQI symptoms straddle the border between continuous and categorical – Although some are fully continuous (e.g. sleep latency) others are less so. For instance, although scored on a range of four several of the scales (such as Subjective Sleep quality) have implicitly binary response options of 'Very good' and 'fairly good' on the one hand and 'fairly bad' and 'very bad' on the other. As analytical work in psychometrics (72) suggests that likert-like graded scales can be treated as continuous only from five ordinal categories upwards, by fitting an LCA we are erring on the side of caution (although a latent profile analysis would likely give similar results). Note that although our analysis divides individuals into discrete classes with specific profiles, it is still possible to examine the conditional response likelihood of responding 'yes' to each symptom as a continuous metric (between 0 and 1) that reflects the nature of the association between the class and the outcome. By modelling sleep 'types' we hope to illustrate the complex patterns in a more intelligible manner – notably, doing so allows us to examine whether the likelihood of belonging to any sleep 'type' changes as a function of age.

Next we examined evidence for distinct sleep types using We fit a set of possible models (varying from 2 to 6 sleep types) We found that the four class solution gives the best solution, according to the Bayesian Information Criterion (73) (BIC for 4 Classes = 11874.67, lowest BIC for other solutions= 11892.17 (5 classes) (with 50 repetitions per class, at 5000 maximum iterations). Next we inspected the nature of the sleep types, the prevalence of each 'sleep type' in the population, and whether the likelihood of belonging to a certain sleep type changes across the lifespan. See Figure 2 for the component profiles of the four sleep types identified.

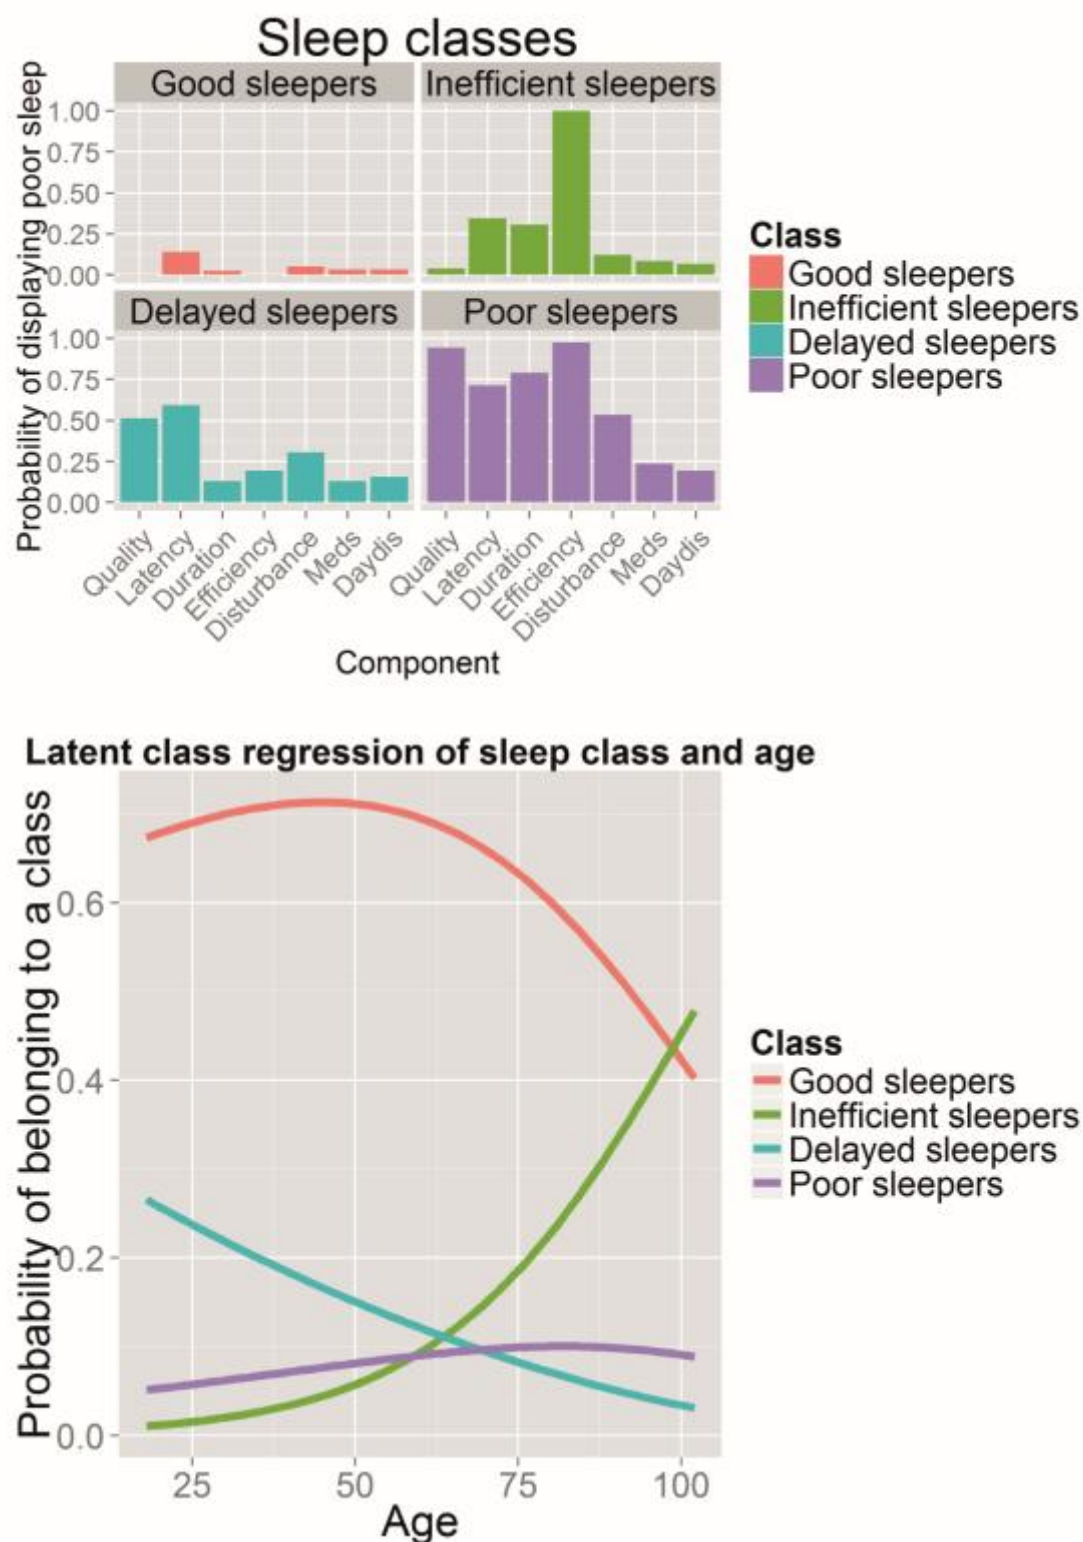

**Figure 2.** Latent Class Analysis. Panel A shows the sleep quality profiles for each of the four classes. Panel B shows the conditional probability of belonging to each class across the lifespan.

Class 1, 'Good sleepers', make up 68.62% of participants. Their sleep profile is shown in Figure 2A, top left, and is characterised by a low probability of responding 'poor' to any of the sleep components. Class 2, 'inefficient sleepers', make up 13.05% of the participants, and are characterized by poor sleep Efficiency: Members of this group uniformly (100%) report poor sleep Efficiency, despite relatively low prevalence of other sleep problems, as seen in Figure 2A, top right. Class 3, 'Delayed Sleepers' seen in the bottom left of Figure 2a, makes up 9.76% of the participants: characterized by modestly poor sleep across the board, but a relatively high probability of poor scores on Sleep Latency (60%), Sleep Quality (54%) and sleep Disturbance (29.2%). Finally, Class 4, 'Poor sleepers', make up 8.6% of the participants, shown bottom right in Figure 2A. Their responses to any of the seven sleep components are likely to be 'poor' or 'very poor', almost universally so for 'sleep quality' (97%) and 'Sleep Efficiency' (96.6%).

Next, we including age as a covariate (simultaneously including a covariate is known as *latent class regression* or concomitant-variable latent class models (74). This analysis, visualised in Figure 2b, shows that the probability of membership of each classes compared to the reference class (good sleepers) changes significantly across the lifespan for each of the classes (Class 2 versus class 1: beta/SE= 0.054/0.0069,  $t=7.9$ , Class 3 versus class 1: beta/SE= -0.020/0.0057,  $t=-3.63$ , Class 4 versus class 1: beta/SE 0.015/0.0049,  $t=3.05$ ), for more details on generalized logit coefficients , see (71). The frequency of Class 1 (Good sleepers) peaks in middle to late adulthood, dropping increasingly quickly after age 50. Class 2 (Inefficient sleepers) are relatively rare in younger individuals, but the prevalence increases rapidly in individuals over age 50. On the other hand, Class 3 (Delayed sleepers) shows a steady decrease in the probability of an individual showing this profile across the lifespan, suggesting that this specific pattern of poor sleep is more commonly associated with younger adults. Finally, the proportion of Class 4 (poor sleepers) members increases only slightly across the lifespan. Together, the latent class analysis provides additional evidence that the PSQI sum score as an indicator of sleep quality does not fully capture the subtleties of age-related differences. Age-related changes in sleep patterns are characterized by specific, clustered patterns



of sleep problems that cannot be adequately characterized by summation of the component scores. The above analyses show how both a summary measure and individual measures of sleep quality change across the lifespan. Next, we examined the relationships between sleep quality measures (seven components and the global PSQI score) and health variables (specific variables across four domains, as shown in Table 1).

## **Sleep, health domains and age**

### *Cognitive health*

First, we examined the relationships between sleep quality and seven measures of cognitive health (see Table 1 for details). We visualize our findings using tileplots (75). Each cell shows the numeric effect size (R-squared, 0-100) of the bivariate association between a sleep component and a health outcome, colour coded by the statistical evidence for a relationship using the Bayes Factor. If the parameter estimate is positive, the r-squared value has the symbol '+' added (note the interpretation depends on the nature of the variable, cf. Table 1). As can be seen in Supplementary Figure 3, several relationships exist between measures of cognitive health and measures of sleep quality. However, these results attenuate in a multiple regression model including age as shown in Figure 3.

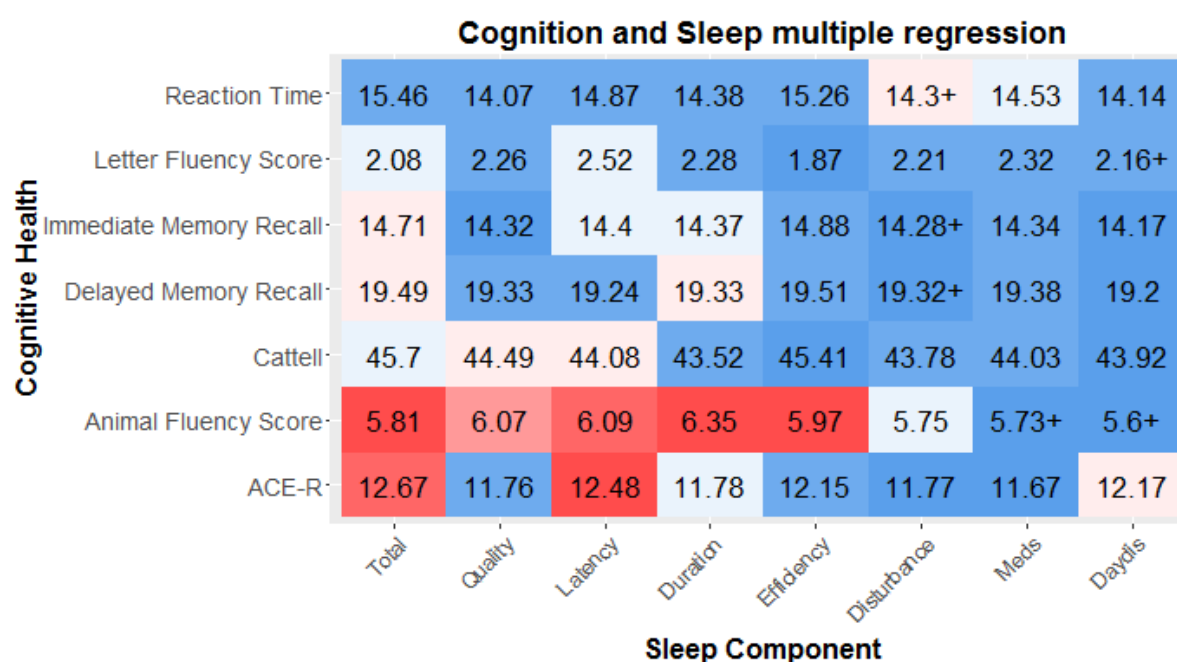

**Figure 3.** Simple regressions between sleep components and Cognitive Health.

The strength of the effect is colour-coded by Bayes Factor, and the effect size is shown as r-squared (as a percentage out of 100). Sample varies across components and measures due to varying missingness. Cattell and Reaction Time were measured only in the imaging cohort: mean N = 648, N=11.11. Sample sizes for 5 other domains are similar: mean N= 2300.25, SD= 65.57)

316

317 The cognitive abilities most strongly associated with poor sleep are a measure of general cognitive  
 318 health, ACE-R, and a test of verbal phonemic fluency. Two patterns emerged: First, the strongest  
 319 predictor across the simple and multiple regressions was for the PSQI Total score. Tentatively this  
 320 suggests that a cumulative index of sleep problems, rather than any specific pattern of poor sleep, is  
 321 the biggest risk factor for poorer cognitive performance. Secondly, after controlling for age, the most  
 322 strongly affected cognitive measure is phonemic fluency, the ability to generate name as many  
 323 different words as possible starting with a given letter within a minute. Verbal fluency is commonly  
 324 used as a neuropsychological test (76). Previous work suggests it depends on both the ability to  
 325 cluster (generating words within a semantic cluster) and to switch (switching between categories),  
 326 and is especially vulnerable to frontal and temporal lobe damage (with specific regions dependant  
 327 on either a semantic or phonemic task (77)). Although modest in size, our findings suggests this task,

dependent on multiple executive processes, is particularly affected by poor sleep quality (78). The second strongest association was with the ACE-R, a general cognitive test battery similar in style and content to the MMSE. When an interaction term with age was included, little evidence for interactions with age (mean  $\log BF_{10} = -2.09$ , see Supplementary Figure 4), suggesting that the negative associations between sleep and cognitive performance are a constant feature across the lifespan, rather than specifically in elderly individuals. Together this suggests that poor sleep quality is modestly but consistently associated with poorer general cognitive performance across the lifespan, most strongly with semantic fluency.

### *Neural Health*

Using Diffusion Tensor Imaging, we estimated a general index of white matter integrity in 10 tracts (59) (shown in Supplementary Figure 5), by taking the average Fractional Anisotropy in each white matter ROI (see (79) for more information). We use the data from a subsample of 641 individuals (age  $M = 54.87$ , range 18.48-88.96) who were scanned in a 3T MRI scanner (for more details regarding the pipeline, sequence and processing steps, see (22,79). Regressing neural WM ROI's on sleep quality, we find several small effects, with the strongest associations between sleep efficiency and neural health (see Supplementary Figure 6). All effects are such that poorer sleep is associated with poorer neural health, apart from a small effect in the opposite direction for Uncinate and Daytime Dysfunction ( $BF_{10} = 6.20$ ). However, when age is included as a covariate, the negative associations between sleep quality and white matter health are attenuated virtually to zero (Figure 4, mean/median  $BF_{10} = 0.18/.10$ ), with Bayes Factors providing strong evidence for the lack of associations between sleep quality and white matter integrity. One exception was observed: The use of Sleep Medication is associated with *better* neural health in the corticospinal tract, a region previously found to be affected by pathological sleep problems such as sleep apnoea (33). However,

this effect is very small ( $BF_{10}=3.24$ ) given the magnitude of the sample and the range of comparisons, so should be interpreted with caution.

| Neural Health and Sleep multiple regression |          |        |         |         |          |            |             |        |        |
|---------------------------------------------|----------|--------|---------|---------|----------|------------|-------------|--------|--------|
| White Matter Tracts                         | UNC      | 13.84  | 12.95   | 12.86   | 12.79+   | 13.89      | 12.66       | 12.83  | 13.45+ |
|                                             | SLF      | 18.35  | 17.09+  | 18      | 17.91    | 18.23      | 17.06       | 17.12+ | 17.31+ |
|                                             | ILF      | 25.56+ | 25.71   | 25.75+  | 25.61+   | 25.55      | 25.37+      | 25.47+ | 25.46+ |
|                                             | IFOF     | 33.48+ | 33.66+  | 33.43   | 33.19+   | 33.53+     | 33.29       | 33.49  | 33.54+ |
|                                             | FMin     | 51.11  | 51.79+  | 51.89   | 51.84+   | 51.23      | 51.65       | 51.66  | 51.59+ |
|                                             | FMaj     | 10.9   | 11.66+  | 11.59   | 11.41+   | 11.15+     | 11.69       | 11.66  | 11.56  |
|                                             | CST      | 11.72+ | 11.74   | 11.66+  | 11.73+   | 11.25      | 11.73+      | 12.6+  | 11.8+  |
|                                             | CINGHipp | 2.21   | 2.1     | 1.86+   | 2.07     | 2.25       | 1.95        | 2.11+  | 1.93+  |
|                                             | CING     | 4.3    | 4.21+   | 4.22    | 4.6+     | 4.59       | 4.39        | 4.18   | 4.55+  |
|                                             | ATR      | 21.76  | 21.76+  | 22.06   | 21.82+   | 21.82      | 22.05       | 21.63  | 21.56+ |
|                                             |          | Total  | Quality | Latency | Duration | Efficiency | Disturbance | Meds   | Daydis |
| Sleep Component                             |          |        |         |         |          |            |             |        |        |

**Figure 4.** Multiple regressions between sleep components and Neural Health. Each cell represents the relationship between a sleep component and the mean neural health in a given tract as index by Fractional Anisotropy. Numbers represent R-squared, the sample size is show in the last column. Strong associations are observed between measures of Sleep Efficiency and multiple tracts, along with sporadic associations between other components and tracts. White matter tracts abbreviations: Uncinate fasciculus (UNC), superior longitudinal fasciculus (SLF), inferior longitudinal fasciculus (ILF), inferior Fronto-occipital fasciculus (IFOF), forceps minor (FMin), forceps major (FMaj), cerebrospinal tract (CST), the ventral cingulate gyrus (CINGHipp), the dorsal cingulate gyrus (CING), and the anterior thalamic radiations (ATR). N varies slightly across components due to varying missingness (N mean = 631.325, SD = 10.32).

Finally, we tested for any interactions by including a mean-scaled interaction term (sleep\*age, Supplementary Figure 7). This analysis found evidence for a significant interaction, between the Superior Longitudinal Fasciculus (SLF) and Sleep Medication ( $BF_{10}= 13.77$ ), such that better neural health in the SLF was associated with the use of Sleep Medication more strongly in older adults. Together, these findings suggest that in general, once age is taken into account, self-reported sleep problems in a non-clinical sample are *not* associated with poorer neural health, although there is some evidence for a modest associations between better neural health in specific tracts and the use of sleep medication in the elderly.

363

## 364 *Physical health*

365           Next we examined whether sleep quality is associated with physical health. Figure 5 shows  
 366 the simple regressions between sleep quality and physical health. Strong associations were found  
 367 between poor overall sleep (PSQI sum score) and poor self-reported health, both in general  
 368 ( $\log BF_{10}=77.51$ ) and even more strongly for health in the past 12 months ( $\log BF_{10}=91.25$ ). This may  
 369 be because poorer sleep, across all components, directly affects general physical health (43,80) or  
 370 because people subjectively experience sleep quality as a fundamental part of overall general health.  
 371 A second association was between BMI and poor sleep, most strongly for Duration ( $\log BF_{10}=4.69$ ).

372           This not only replicates previous findings but is in line with an increasing body of evidence  
 373 that suggests that shorted sleep duration causes metabolic changes, which in turn increases the risk  
 374 of both diabetes mellitus and obesity (43,81,82). Next, we examined whether these effects were  
 375 attenuated once age was included. We show that although the relationships are slightly weaker, the  
 376 overall pattern remains (Supplementary Figure 8), suggesting these associations are not merely co-  
 377 occurrences across the lifespan. Our findings suggest self-reported sleep quality, especially sleep  
 378 Duration, is related to differences in physical health outcomes in a healthy sample.

Finally, there was evidence of a single interaction with age (Supplementary Figure 9): Although poor sleep Duration was associated with *higher* diastolic blood pressure in younger adults, it was associated with *lower* diastolic blood pressure in older individuals ( $BF_{10} = 8.43$ ). This may reflect the fact that diastolic blood pressure is related to cardiovascular health in a different way across the lifespan, although given the small effect size it should be interpreted with caution.

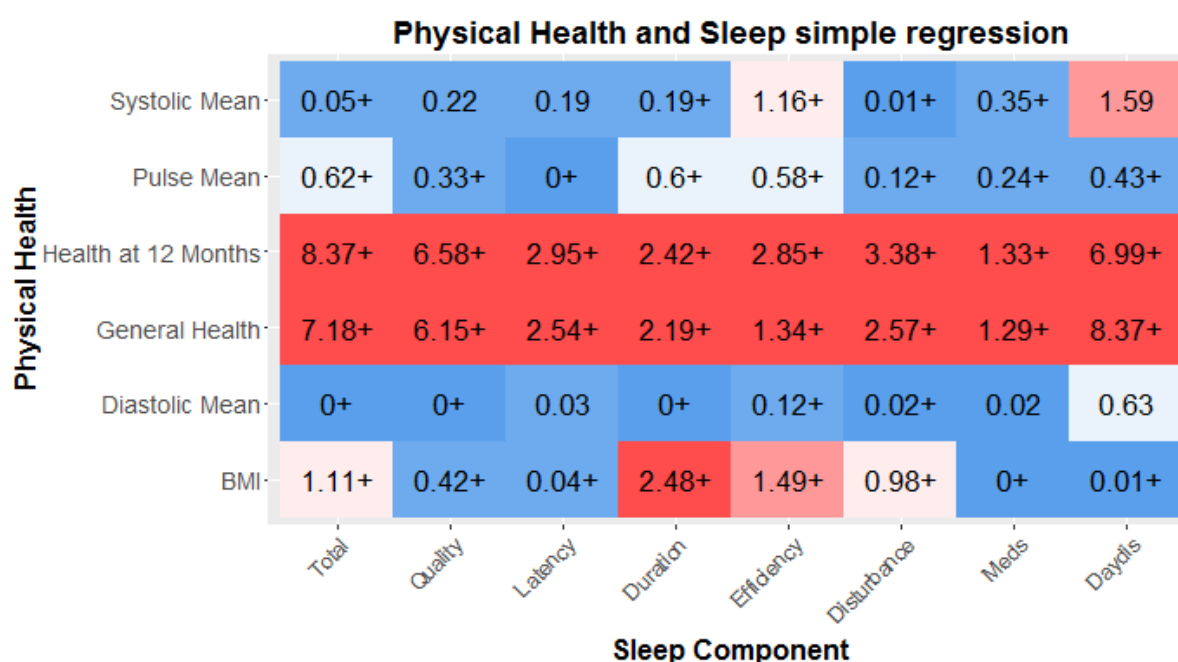

**Figure 5** Physical health and sleep quality. Numbers represent R-squared, the sample size is shown in the last column. Strong associations between general indices of health and sleep quality are found, and several more modest relationships with BMI and sleep quality. Self-reported health (12 month and General) were measured in the full cohort (Mean = 2315.37, SD=66.29), the other indicators were measured in the imaging cohort only (Mean = 569.87, SD= 11.16).

### Mental health

Finally, we examined the relationship between sleep quality and mental health, as measured by the Hospital Anxiety and Depression Scale (56). One benefit of the HADS in this context is that, unlike some other definitions (e.g. the DSM-V), sleep quality is not an integral (scored) symptom of these dimensions. As shown in Supplementary Figure 10, there are very strong relationships between all aspects of sleep quality and measures of both anxiety and depression. The strongest predictors of

Depression are Daytime Dysfunction ( $\log BF_{10} = 245.9$ ,  $R^2 = 19.26\%$ ), followed by the overall sleep score ( $\log BF_{10} = 170.5$ ,  $R^2 = 14.92\%$ ) and sleep quality ( $\log BF_{10} = 106.8$ ,  $R^2 = 8.9\%$ ). The effects size for Anxiety was comparable but slightly smaller in magnitude. When age is included as a covariate the relationships remained virtually unchanged (Supplementary Figure 11), suggesting these relationships are present throughout across the lifespan. These findings replicate and extend previous work, suggesting that sleep quality is strongly associated with both anxiety and depression across the lifespan.

Finally we examined a model with an interaction term (Supplementary Figure 12). Most prominently we found interactions with age in the relationship between HADS depression and the PSQI Total, and in the relationship between HADS depression and Sleep Duration, such that for the relationship between anxiety and overall sleep quality is stronger in younger adults ( $BF_{10} = 9.91$ , see Figure 6). Together our findings show that poor sleep quality is consistently, strongly and stably associated with poorer mental health across the adult lifespan.

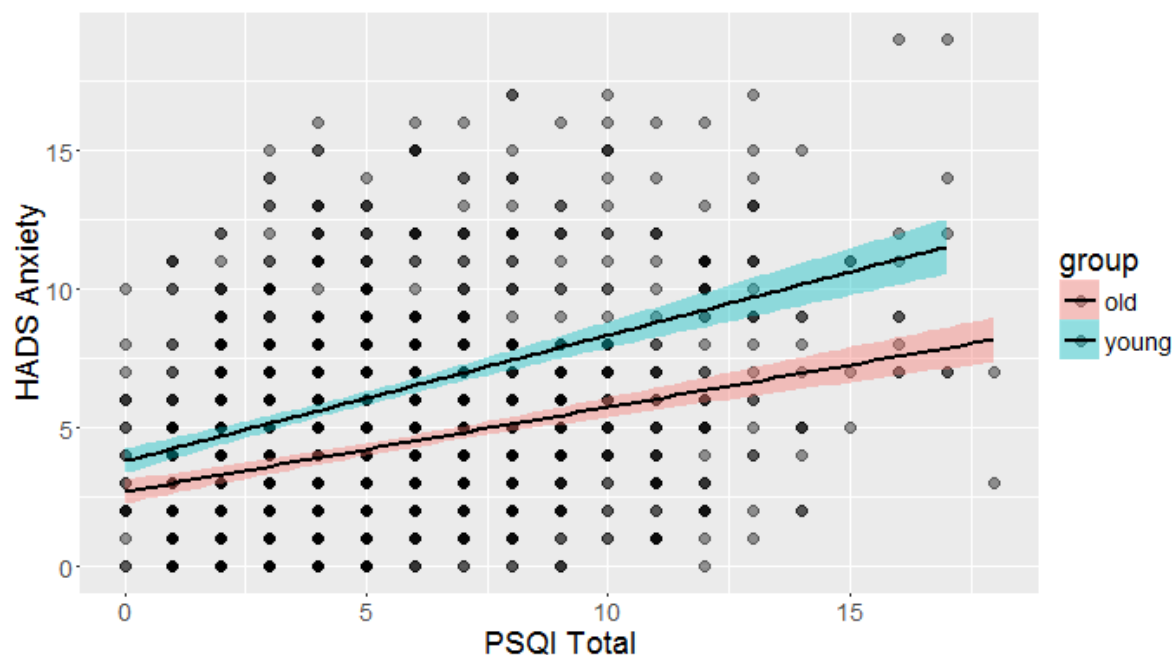

#### Non-linear associations between sleep and health outcomes

In the above analyses, we focused on linear associations between symptoms and health outcomes. However, for one aspect of sleep, namely sleep duration (in hours), evidence exists that these

associations are likely to be non-linear, such that both shorter and longer than average sleep are associated with poorer health outcomes (e.g. (83–85). This is echoed in clinical criteria for depression, which commonly include that include both hyper- and hypo-somnia as ‘sleep disruption’ symptoms – In other words, both too much or too little sleep are suboptimal. To examine whether we observe evidence for non-linearities we examined the relationship between raw scores on sleep duration (in hours, not transformed to PSQI norms) and health outcomes across the four domains. If the association between sleep and outcomes is indeed u-shaped (or inverted U, depending on the scale) then a Bayesian regression would prefer the less parsimonious model that includes the quadratic term. We observed no non-linear associations between any neural or cognitive health variables. We find strong evidence for a quadratic (subscript q) over a linear (subscript l) associations between sleep duration and HADS anxiety ( $\log BF_{ql} = 19.98$ ), even more strongly so with HADS Depression ( $\log BF_{ql} = 25.83$ , see Figure 7A shows the strongest curvilinear association, namely with depression). We find a similar u-shaped curve with general health ( $BF_{ql} = 277.81$ ) and self-reported health over the last 12 months ( $BF_{ql} = 887.59$ ), the latter shown in Figure 7b. Together, these analyses support previous conclusions that some (although not all) poorer health outcomes can be associated with both too much and too little sleep.

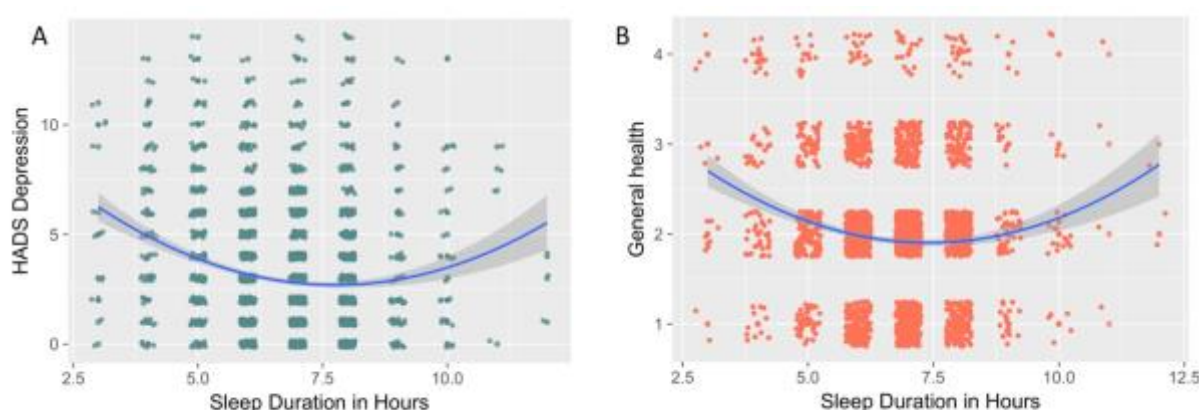

**Figure 7.** Curvilinear associations between sleep duration in hours and A) HADS depression and B) general health (self-reported). For visual clarity a small amount of random jitter was added to the data points.



## DISCUSSION

In this study, we report on the associations between age-related differences in sleep quality and health outcomes in a large, age-heterogeneous sample of community dwelling adults of the Cambridge Neuroscience and Aging (Cam-CAN) cohort. We find that sleep quality generally decreases across the lifespan, most strongly for sleep Efficiency. However age-related changes in sleep patterns are complex and multifaceted, so we used Latent Class Analysis to identify ‘sleep types’ associated with specific sleep quality profiles. We found that Younger adults are more likely than older adults to display a pattern of sleep problems characterised by poor sleep quality and longer sleep latency, whereas older adults are more likely to display inefficient sleeping, characterised by long periods spent in bed whilst not asleep. Moreover, the probability of being a ‘good’ sleeper, unaffected by any adverse sleep symptoms, decreases considerably after age fifty.

Notably, closer investigation of the sleep classes reveals likely further complexities of age-related differences. The category ‘poor sleepers’, most prevalent in older adults, shows high conditional likelihood of ‘poor sleep’ across all symptoms except ‘daytime dysfunction’. One possible explanation is that almost all individuals in this group are beyond retirement age. For this reason, they likely have greater flexibility in tailoring their day to day activities to their energy levels (as opposed to individuals working fulltime), and are therefore less likely to consider themselves ‘disrupted’ even in the presence of suboptimal sleep. Although more detailed, interview-based investigations would be necessary to examine the precise nature of these findings, it stands to reason that certain symptoms change not just in prevalence but also in meaning across the lifespan.

One key strength of our broad phenotypic assessment allows for direct comparison of the different measures of sleep quality and four key health domains. We find strongest associations between sleep quality and mental health, moderate relations between sleep quality and physical health and cognitive health and sleep, virtually all such that poorer sleep is associated with poorer health outcomes. We did not find evidence for associations between self-reported sleep and neural health. Notably, the relationships we observe are mostly stable across the lifespan, affecting

younger and older individuals alike. A notable exception to these effects is the absence of any strong relation (after controlling for age) between sleep quality and neural health as indexed by tract-based average fractional anisotropy. Perhaps surprisingly, given we found strong relationships in the same sample between sleep and other outcomes (e.g. mental health, Figure 10) we find that self-reported sleep problems in a non-clinical sample are not associated with fractional anisotropy above and beyond old age. This is despite the fact that previous work within the same cohort observed moderate to strong associations between white matter and various cognitive outcomes (42,86,87). However, although notable, our finding does not rule out that such associations do exist with other white matter metrics, that they would be observed with objective measures of sleep such as polysomnography, or that the co-occurrence of age-related declines in sleep quality and white matter share an underlying causal association that cannot be teased apart in a cross-sectional sample.

One strength of our study is the assessment of neuroimaging metrics, namely fractional anisotropy, in a large, community-dwelling healthy population. Fractional anisotropy is often used in studies of aging (e.g. Madden, is relatively reliable (88)) and is sensitive to clinical anomalies such as white matter hyperintensities. However, the relationship between FA and white-matter health is indirect (40,89) and drawbacks include its inability to distinguish crossing fibers (e.g. (40,89) and vulnerability to movement and the fact that it likely reflects a combination of underlying physiological properties. Various alternative white matter metrics exist, including summary measures of diffusivity (e.g. axial/radial/mean diffusivity), volumetric measures of white matter hyperintensity (e.g.) and various innovative measures currently in development, but their physiological validity is ongoing (89,90).

While there are limitations of self-report measures including in older cohorts (19), including the fact that they likely reflect different aspects of sleep health than polysomnography (sleep in the lab), our results suggest there are considerable advantages in using self-reported sleep measures: first, obtaining sleep quality data in a large and broadly phenotyped sample is feasible; and second,

our results demonstrated clear and consistent associations across multiple domains for both subjective (e.g. self-reported health) and objective measures (e.g. memory tests, BMI), which both replicate and extend previous lab-based sleep findings. Future work should ideally simultaneously measure polysomnography and self-report in longitudinal, large scale cohorts to fully capture the range of overlapping and complementary relations between different aspects of sleep quality and health outcomes (19).

For both self-report and objective measures of sleep quality an open question is that of causality: Does poor sleep affect health outcomes, do health problems affect sleep, are they both markers of some third problem, or do causal influences go both ways? Most likely, all these patterns occur to varying degrees. Previous studies have shown that sleep quality causally affects health outcomes such as diabetes (43) and memory consolidation (1) while other evidence suggests that depression directly affect sleep quality (91,92) and that damage to neural structures may affect sleep regulation (93). Although our findings are in keeping with previous findings, our cross-sectional sample cannot tease apart the causal direction of the observed associations, more work remains to be done to disentangle these complex causal pathways.

In our paper we focus on a healthy, age-heterogeneous community dwelling sample. This allows us to study the associations between healthy aging and self-reported sleep quality, but comes with two key limitations of the interpretations of our findings. First and foremost, our findings are cross-sectional, not longitudinal. This means we can make inferences about age-related *differences*, but not necessarily age-related *changes* (94,95). One reason why cross-sectional and longitudinal estimates may diverge is that older adults can be thought of as cohorts that differ from the younger adults in more ways than age alone. For example, our age range includes individuals born in the twenties and thirties of the 20th century. Compared to someone born in the 21<sup>st</sup> century, these individuals will likely have experience various differences during early life development (e.g. less broadly accessible education, lower quality of healthcare, poorer nutrition and similar patterns). For some of our measures, these are inherent limitations –*truly* longitudinal study of neural aging is

inherently impossible as scanner technology has not been around sufficiently long. This means our findings likely reflect a combination of effects attributable to age-related changes as well as baseline differences between subpopulations that may affect both mean differences as well as developmental trajectories.

Second, our sample reflects an atypical population in the sense that they are willing and able to visit the laboratory on multiple occasions for testing sessions. This subsample is likely a more healthy subset of the full population, which will mean the range of (poor) sleep quality as well as (poorer) health outcomes will likely be less extreme than in the full population. However, this challenge is not specific to our sample. In fact, as the Cam-CAN cohort was developed using stratified sampling based on primary healthcare providers, our sample is likely as population-representative as is feasible for a cohort of this magnitude and phenotypic breadth (see (12) for further details). Nonetheless, a healthier subsample may lead to restriction of range (96), i.e. an attenuation of the strength of the associations observed between sleep quality and health outcomes. Practically, this means that our results likely generalise to comparable, healthy community dwelling adults, but not necessarily to populations that include those affected by either clinical sleep deprivation or other serious health conditions.

## Conclusions

Taken together, our study allows several conclusions. First, although we replicate the age-related deterioration in some aspects of sleep quality, other aspects remain stable or even improve. Second, we show that the profile of sleep quality changes across the lifespan. This is important methodologically, as it suggests that PSQI sum scores do not capture the full picture, especially in age-heterogeneous samples. Moreover, it is important from a psychological standpoint: We show that 'sleep quality' is a multidimensional construct and should be treated as such if we wish to understand the complex effects and consequences of sleep quality across the lifespan. Third, moderate to strong relations exist between sleep quality and cognitive, physical and mental health, and these relations largely remain stable across the lifespan. In contrast, we show evidence that in

non-clinical populations, poorer self-reported sleep is not reliably associated with poorer neural health. Finally, we find that for absolute sleep duration, we replicate previous findings that both longer and shorter than average amounts of sleep are association with poorer self-reported general health and higher levels of depression and anxiety.

Together with previous experimental and longitudinal evidence, our findings suggest that at least some age-related decreases in health outcomes may be due to poorer sleep quality. We show that self-reported sleep quality can be an important indicator of other aspects of healthy functioning throughout the lifespan, especially for mental and general physical health. Our findings suggest accurate understanding of sleep quality is essential in understanding and supporting healthy aging across the lifespan.

## Author contributions

AG, MS and MS designed the study. AG and RAK performed the analyses. CC organized and conducted the data collection. AG, MS and RAK wrote the manuscript. YL provided considerable expertise on sleep and poor sleep outcomes. All authors approved the final manuscript.

## Acknowledgements

The Cambridge Centre for Ageing and Neuroscience (Cam-CAN) research was supported by the Biotechnology and Biological Sciences Research Council (grant number BB/H008217/1). RAK is supported by the Sir Henry Wellcome Trust (grant number 107392/Z/15/Z) and the by UK Medical Research Council Programme (MC-A060-5PR61).

We would like to thank Richard Morey and Eric-Jan Wagenmakers for valuable suggestions regarding the use of the BayesFactor package. We are grateful to the Cam-CAN respondents and their primary care teams in Cambridge for their participation in this study. We also thank colleagues at the MRC Cognition and Brain Sciences Unit MEG and MRI facilities for their assistance. The Cam-CAN corporate author consists of the project principal personnel: Lorraine K Tyler, Carol Brayne, Edward T Bullmore, Andrew C Calder, Rhodri Cusack, Tim Dalgleish, John Duncan, Richard N Henson, Fiona E Matthews, William D Marslen-Wilson, James B Rowe, Research Associates: Karen Campbell, Teresa Cheung, Simon Davis, Linda Geerligs, Anna McCarrey, Abdur Mustafa, Darren Price, David Samu, Jason R Taylor, Matthias Treder, Kamen Tsvetanov, Janna van Belle, Nitin Williams; Research Assistants: Lauren Bates, Tina Emery, Sharon Erzinçlioglu, Sofia Gerbase, Stanimira Georgieva, Claire Hanley, Beth Parkin, David Troy; Affiliated Personnel: Tibor Auer, Marta Correia, Lu Gao, Emma Green, Rafael Henriques; Research Interviewers: Jodie Allen, Gillian Amery, Liana Amunts, Anne Barcroft, Amanda Castle, Cheryl Dias, Jonathan Dowrick, Melissa Fair, Hayley Fisher, Anna Goulding, Adarsh Grewal, Geoff Hale, Andrew Hilton, Frances Johnson, Patricia Johnston, Thea Kavanagh-Williamson, Magdalena Kwasniewska, Alison McMinn, Kim Norman, Jessica Penrose, Fiona Roby, Diane Rowland, John Sargeant, Maggie Squire, Beth Stevens, Aldabra Stoddart, Cheryl Stone, Tracy Thompson, Ozlem Yazlik; and administrative staff: Dan Barnes, Marie Dixon, Jaya Hillman, Joanne Mitchell, Laura Villis.

583

# References

- 584 1. Stickgold R. Sleep-dependent memory consolidation. *Nature* [Internet]. 2005 Oct 27 [cited  
585 2014 Jul 10];437(7063):1272–8. Available from: <http://dx.doi.org/10.1038/nature04286>
- 586 2. Inoué S, Honda K, Komoda Y. Sleep as neuronal detoxification and restitution. *Behav Brain*  
587 *Res*. 1995 Jul;69(1–2):91–6.
- 588 3. Xie L, Kang H, Xu Q, Chen MJ, Liao Y, Thiyagarajan M, et al. Sleep drives metabolite clearance  
589 from the adult brain. *Science* [Internet]. NIH Public Access; 2013 Oct 18 [cited 2014 Jul  
590 11];342(6156):373–7. Available from:  
591 <http://europepmc.org/articles/PMC3880190/?report=abstract>
- 592 4. D’Ambrosio C, Redline S. Impact of Sleep and Sleep Disturbances on Obesity and Cancer.  
593 Redline S, Berger NA, editors. New York, NY: Springer New York; 2014.
- 594 5. Crowley K. Sleep and Sleep Disorders in Older Adults. *Neuropsychol Rev* [Internet]. Springer  
595 US; 2011 Mar 12 [cited 2017 Feb 10];21(1):41–53. Available from:  
596 <http://link.springer.com/10.1007/s11065-010-9154-6>
- 597 6. Ohayon MM, Carskadon MA, Guilleminault C, Vitiello M V. Meta-analysis of quantitative  
598 sleep parameters from childhood to old age in healthy individuals: developing normative  
599 sleep values across the human lifespan. *Sleep* [Internet]. American Academy of Sleep  
600 Medicine; 2004 Nov 1 [cited 2017 Feb 10];27(7):1255–73. Available from:  
601 <http://www.ncbi.nlm.nih.gov/pubmed/15586779>
- 602 7. Middelkoop HAM, Smilde-van den Doel DA, Neven AK, Kamphuisen HAC, Springer CP.  
603 Subjective Sleep Characteristics of 1,485 Males and Females Aged 50-93: Effects of Sex and  
604 Age, and Factors Related to Self-Evaluated Quality of Sleep. *Journals Gerontol Ser A Biol Sci*  
605 *Med Sci* [Internet]. 1996 May 1 [cited 2015 Jun 22];51A(3):M108–15. Available from:  
606 <http://biomedgerontology.oxfordjournals.org/content/51A/3/M108.short>
- 607 8. Schmidt C, Peigneux P, Cajochen C. Age-related changes in sleep and circadian rhythms:  
608 impact on cognitive performance and underlying neuroanatomical networks. *Front Neurol*  
609 [Internet]. 2012 Jan [cited 2014 Jun 4];3:118. Available from:  
610 [http://www.pubmedcentral.nih.gov/articlerender.fcgi?artid=3405459&tool=pmcentrez&ren](http://www.pubmedcentral.nih.gov/articlerender.fcgi?artid=3405459&tool=pmcentrez&rendertype=abstract)  
611 [dertype=abstract](http://www.pubmedcentral.nih.gov/articlerender.fcgi?artid=3405459&tool=pmcentrez&rendertype=abstract)
- 612 9. Leng Y, Wainwright NWJ, Cappuccio FP, Surtees PG, Luben R, Wareham N, et al. Self-reported  
613 sleep patterns in a British population cohort. *Sleep Med* [Internet]. 2014 Mar [cited 2016 Jan  
614 28];15(3):295–302. Available from:  
615 <http://www.sciencedirect.com/science/article/pii/S1389945714000185>
- 616 10. Stanley N. The physiology of sleep and the impact of ageing. *Eur Urol Suppl* [Internet]. 2005  
617 Jan [cited 2014 Sep 23];3(6):17–23. Available from:  
618 <http://www.sciencedirect.com/science/article/pii/S156990560580003X>
- 619 11. Briones B, Adams N, Strauss M, Rosenberg C, et al. Relationship between sleepiness and  
620 general health status. *Sleep*. 1996;19(7):583–8.
- 621 12. Shafto MA, Tyler LK, Dixon M, Taylor JR, Rowe JB, Cusack R, et al. The Cambridge Centre for  
622 Ageing and Neuroscience (Cam-CAN) study protocol: a cross-sectional, lifespan,  
623 multidisciplinary examination of healthy cognitive ageing. *BMC Neurol* [Internet]. BioMed  
624 Central; 2014 Jan 14 [cited 2015 May 20];14(1):204. Available from:  
625 <http://bmcneurol.biomedcentral.com/articles/10.1186/s12883-014-0204-1>
- 626 13. Buysse D, Reynolds C, Monk T, Berman S, Kupfer D. The Pittsburgh Sleep Quality Index: A new

- instrument for Psychiatric Practise and Research .pdf. 1988. p. 193–213.
14. Carpenter JS, Andrykowski MA. Psychometric evaluation of the pittsburgh sleep quality index. *J Psychosom Res* [Internet]. 1998 Jul [cited 2015 Dec 10];45(1):5–13. Available from: <http://www.sciencedirect.com/science/article/pii/S0022399997002985>
15. Kang S-H, Yoon I-Y, Lee SD, Kim J-W. The impact of sleep apnoea syndrome on nocturia according to age in men. *BJU Int* [Internet]. 2012 Dec [cited 2015 Nov 25];110(11 Pt C):E851-6. Available from: <http://www.ncbi.nlm.nih.gov/pubmed/22958406>
16. Lou P, Qin Y, Zhang P, Chen P, Zhang L, Chang G, et al. Association of sleep quality and quality of life in type 2 diabetes mellitus: a cross-sectional study in China. *Diabetes Res Clin Pract* [Internet]. 2015 Jan [cited 2015 Nov 25];107(1):69–76. Available from: <http://www.sciencedirect.com/science/article/pii/S0168822714004604>
17. Mellor A, Waters F, Olaithe M, McGowan H, Bucks RS. Sleep and aging: examining the effect of psychological symptoms and risk of sleep-disordered breathing. *Behav Sleep Med* [Internet]. Routledge; 2014 Jan 28 [cited 2015 Nov 25];12(3):222–34. Available from: <http://www.tandfonline.com/doi/abs/10.1080/15402002.2013.801343#.VIVu9HYrKHs>
18. Kushida CA, Littner MR, Morgenthaler T, Alessi CA, Bailey D, Coleman J, et al. Practice Parameters for the Indications for PSG—AASM Practice Parameters Practice Parameters for the Indications for Polysomnography and Related Procedures: An Update for 2005. *Sleep*. 2005;28(4).
19. Landry GJ, Best JR, Liu-Ambrose T. Measuring sleep quality in older adults: a comparison using subjective and objective methods. *Front Aging Neurosci* [Internet]. Frontiers; 2015 Sep 7 [cited 2015 Sep 7];7. Available from: <http://journal.frontiersin.org/article/10.3389/fnagi.2015.00166/abstract>
20. Altena E, Vrenken H, Van der Werf YD, Heuvel OA van den H, Someren EJW van, van den Heuvel OA, et al. Reduced Orbitofrontal and Parietal Gray Matter in Chronic Insomnia: A Voxel-Based Morphometric Study [Internet]. Vol. 67, *BIOL PSYCHIATRY*. 2010 [cited 2014 Jul 3]. p. 182–185. Available from: <http://www.sciencedirect.com/science/article/pii/S0006322309009548>
21. Spiegelhalter K, Regen W, Prem M, Baglioni C, Nissen C, Feige B, et al. Reduced anterior internal capsule white matter integrity in primary insomnia. *Hum Brain Mapp* [Internet]. 2014 Jul 13 [cited 2015 Aug 4];35(7):3431–8. Available from: <http://doi.wiley.com/10.1002/hbm.22412>
22. Taylor JR, Williams N, Cusack R, Auer T, Shafto MA, Dixon M, et al. The Cambridge Centre for Ageing and Neuroscience (Cam-CAN) data repository: Structural and functional MRI, MEG, and cognitive data from a cross-sectional adult lifespan sample. *Neuroimage* [Internet]. 2015 Sep 12 [cited 2015 Sep 21]; Available from: <http://www.sciencedirect.com/science/article/pii/S1053811915008150>
23. Folstein MF, Folstein SE, McHugh PR. “Mini-mental state” a practical method for grading the cognitive state of patients for the clinician. *J Psychiatr Res*. 1975;12:189–98.
24. Mioshi E, Dawson K, Mitchell J, Arnold R, Hodges JR. The Addenbrooke’s Cognitive Examination Revised (ACE-R): a brief cognitive test battery for dementia screening. *Int J Geriatr Psychiatry* [Internet]. 2006 Nov [cited 2015 Sep 29];21(11):1078–85. Available from: <http://www.ncbi.nlm.nih.gov/pubmed/16977673>
25. Regestein QR, Friebely J, Shifren JL, Scharf MB, Wiita B, Carver J, et al. Self-reported sleep in postmenopausal women. *Menopause* [Internet]. 2004 [cited 2015 Feb 17];11(2):198–207.



- 672 Available from:  
673 [http://journals.lww.com/menopausejournal/Abstract/2004/11020/Self\\_reported\\_sleep\\_in\\_p](http://journals.lww.com/menopausejournal/Abstract/2004/11020/Self_reported_sleep_in_p)  
674 [ostmenopausal\\_women.12.aspx](http://journals.lww.com/menopausejournal/Abstract/2004/11020/Self_reported_sleep_in_p)
- 675 26. Curcio G, Ferrara M, De Gennaro L. Sleep loss, learning capacity and academic performance.  
676 Sleep Med Rev [Internet]. 2006 Oct [cited 2015 Sep 15];10(5):323–37. Available from:  
677 <http://www.sciencedirect.com/science/article/pii/S1087079205001231>
- 678 27. Ferracioli-Oda E, Qawasmi A, Bloch MH, Hossain J, Shapiro C, Dikeos D, et al. Meta-Analysis:  
679 Melatonin for the Treatment of Primary Sleep Disorders. Romanovsky AA, editor. PLoS One  
680 [Internet]. Public Library of Science; 2013 May 17 [cited 2017 Jan 31];8(5):e63773. Available  
681 from: <http://dx.plos.org/10.1371/journal.pone.0063773>
- 682 28. Jean-Louis G, Gizycki H, Zizi F. Melatonin effects on sleep, mood, and cognition in elderly with  
683 mild cognitive impairment. J Pineal Res [Internet]. 1998 Nov [cited 2015 Jun 16];25(3):177–  
684 83. Available from: <http://doi.wiley.com/10.1111/j.1600-079X.1998.tb00557.x>
- 685 29. Scullin MK, Bliwise DL. Sleep, Cognition, and Normal Aging: Integrating a Half Century of  
686 Multidisciplinary Research. Perspect Psychol Sci. 2015 Jan;10(1):97–137.
- 687 30. Nebes RD, Buysse DJ, Halligan EM, Houck PR, Monk TH. Self-reported sleep quality predicts  
688 poor cognitive performance in healthy older adults. J Gerontol B Psychol Sci Soc Sci [Internet].  
689 2009 Mar [cited 2014 Sep 8];64(2):180–7. Available from:  
690 [http://www.pubmedcentral.nih.gov/articlerender.fcgi?artid=2655169&tool=pmcentrez&ren](http://www.pubmedcentral.nih.gov/articlerender.fcgi?artid=2655169&tool=pmcentrez&rendertype=abstract)  
691 [dertype=abstract](http://www.pubmedcentral.nih.gov/articlerender.fcgi?artid=2655169&tool=pmcentrez&rendertype=abstract)
- 692 31. Kamba M, Inoue Y, Higami S, Suto Y, Ogawa T, Chen W. Cerebral metabolic impairment in  
693 patients with obstructive sleep apnoea: an independent association of obstructive sleep  
694 apnoea with white matter change. J Neurol Neurosurg Psychiatry [Internet]. 2001  
695 Sep;71(3):334–9. Available from:  
696 [http://www.pubmedcentral.nih.gov/articlerender.fcgi?artid=1737534&tool=pmcentrez&ren](http://www.pubmedcentral.nih.gov/articlerender.fcgi?artid=1737534&tool=pmcentrez&rendertype=abstract)  
697 [dertype=abstract](http://www.pubmedcentral.nih.gov/articlerender.fcgi?artid=1737534&tool=pmcentrez&rendertype=abstract)
- 698 32. Harbison J, Gibson GJ, Birchall D, Zammit-Maempel I, Ford GA. White matter disease and  
699 sleep-disordered breathing after acute stroke. Neurology [Internet]. 2003 Oct 13 [cited 2016  
700 Jan 7];61(7):959–63. Available from: <http://www.neurology.org/content/61/7/959.short>
- 701 33. Macey PM, Kumar R, Woo M a, Valladares EM, Yan-Go FL, Harper RM. Brain structural  
702 changes in obstructive sleep apnea. Sleep [Internet]. 2008 Jul;31(7):967–77. Available from:  
703 <http://www.ncbi.nlm.nih.gov/pubmed/21300501>
- 704 34. Ramos AR, Dong C, Rundek T, Elkind MS V, Boden-Albala B, Sacco RL, et al. Sleep duration is  
705 associated with white matter hyperintensity volume in older adults: the Northern Manhattan  
706 Study. J Sleep Res [Internet]. 2014 Jul 7 [cited 2014 Sep 8];i. Available from:  
707 <http://www.ncbi.nlm.nih.gov/pubmed/25040435>
- 708 35. Unger MM, Belke M, Menzler K, Heverhagen JT, Keil B, Stiasny-Kolster K, et al. Diffusion  
709 tensor imaging in idiopathic REM sleep behavior disorder reveals microstructural changes in  
710 the brainstem, substantia nigra, olfactory region, and other brain regions. Sleep [Internet].  
711 American Academy of Sleep Medicine; 2010 Jun 1 [cited 2015 Dec 28];33(6):767–73.  
712 Available from: [/pmc/articles/PMC2881532/?report=abstract](http://pmc/articles/PMC2881532/?report=abstract)
- 713 36. Macey PM, Henderson LA, Macey KE, Alger JR, Frysinger RC, Woo MA, et al. Brain  
714 morphology associated with obstructive sleep apnea. Am J Respir Crit Care Med [Internet].  
715 American Thoracic Society; 2002 Nov 15 [cited 2014 Nov 16];166(10):1382–7. Available from:  
716 <http://www.atsjournals.org/doi/abs/10.1164/rccm.200201-050OC#.VGkRkfmsXlk>

- 717 37. Sexton CE, Storsve AB, Walhovd KB, Johansen-Berg H, Fjell AM. Poor sleep quality is  
718 associated with increased cortical atrophy in community-dwelling adults. *Neurology*  
719 [Internet]. 2014 Sep 9 [cited 2016 Jun 21];83(11):967–73. Available from:  
720 <http://www.ncbi.nlm.nih.gov/pubmed/25186857>
- 721 38. Debetto S, Markus HS. The clinical importance of white matter hyperintensities on brain  
722 magnetic resonance imaging: systematic review and meta-analysis. *BMJ* [Internet]. 2010 Jul  
723 26 [cited 2016 Jan 12];341(jul26 1):c3666–c3666. Available from:  
724 <http://www.bmj.com/content/341/bmj.c3666>
- 725 39. Mädler B, Drabycz SA, Kolind SH, Whittall KP, MacKay AL. Is diffusion anisotropy an accurate  
726 monitor of myelination? Correlation of multicomponent T2 relaxation and diffusion tensor  
727 anisotropy in human brain. *Magn Reson Imaging* [Internet]. 2008 Sep [cited 2016 Jan  
728 6];26(7):874–88. Available from: <http://www.ncbi.nlm.nih.gov/pubmed/18524521>
- 729 40. Jones DK, Knösche TR, Turner R. White matter integrity, fiber count, and other fallacies: The  
730 do's and don'ts of diffusion MRI. Vol. 73, *NeuroImage*. 2013. p. 239–54.
- 731 41. Maillard P, Fletcher E, Harvey D, Carmichael O, Reed B, Mungas D, et al. White matter  
732 hyperintensity penumbra. *Stroke* [Internet]. 2011 Jul 1 [cited 2016 Jan 6];42(7):1917–22.  
733 Available from: <http://stroke.ahajournals.org/content/42/7/1917.short>
- 734 42. Kievit RA, Davis SW, Griffiths J, Correia MM, Cam-CAN, Henson RN. A watershed model of  
735 individual differences in fluid intelligence. *Neuropsychologia*. 2016;91:186–98.
- 736 43. Spiegel K, Tasali E, Leproult R, Van Cauter E. Effects of poor and short sleep on glucose  
737 metabolism and obesity risk. *Nat Rev Endocrinol* [Internet]. Nature Publishing Group; 2009  
738 May [cited 2015 Aug 4];5(5):253–61. Available from:  
739 <http://dx.doi.org/10.1038/nrendo.2009.23>
- 740 44. Grandner MA, Jackson NJ, Izci-Balserak B, Gallagher RA, Murray-Bachmann R, Williams NJ, et  
741 al. Social and Behavioral Determinants of Perceived Insufficient Sleep. *Front Neurol*  
742 [Internet]. Frontiers; 2015 Jan 5 [cited 2015 Aug 3];6:112. Available from:  
743 <http://journal.frontiersin.org/article/10.3389/fneur.2015.00112/abstract>
- 744 45. Leng Y, Wainwright NWJ, Cappuccio FP, Surtees PG, Hayat S, Luben R, et al. Daytime napping  
745 and the risk of all-cause and cause-specific mortality: a 13-year follow-up of a British  
746 population. *Am J Epidemiol* [Internet]. 2014 May 1 [cited 2014 Aug 27];179(9):1115–24.  
747 Available from:  
748 [http://www.pubmedcentral.nih.gov/articlerender.fcgi?artid=3992821&tool=pmcentrez&ren  
749 dertype=abstract](http://www.pubmedcentral.nih.gov/articlerender.fcgi?artid=3992821&tool=pmcentrez&rendertype=abstract)
- 750 46. Leng Y, Cappuccio FP, Wainwright NWJ, Surtees PG, Luben R, Brayne C, et al. Sleep duration  
751 and risk of fatal and nonfatal stroke: a prospective study and meta-analysis. *Neurology*  
752 [Internet]. 2015 Mar 17 [cited 2016 Jan 28];84(11):1072–9. Available from:  
753 <http://www.neurology.org/content/early/2015/02/25/WNL.0000000000001371.abstract>
- 754 47. Hoevenaer-Blom MP, Spijkerman AMW, Kromhout D, van den Berg JF, Verschuren WMM.  
755 Sleep duration and sleep quality in relation to 12-year cardiovascular disease incidence: the  
756 MORGEN study. *Sleep* [Internet]. 2011 Nov [cited 2016 Jan 6];34(11):1487–92. Available  
757 from:  
758 [http://www.pubmedcentral.nih.gov/articlerender.fcgi?artid=3198203&tool=pmcentrez&ren  
759 dertype=abstract](http://www.pubmedcentral.nih.gov/articlerender.fcgi?artid=3198203&tool=pmcentrez&rendertype=abstract)
- 760 48. Strine TW, Chapman DP. Associations of frequent sleep insufficiency with health-related  
761 quality of life and health behaviors. *Sleep Med* [Internet]. 2005 Jan [cited 2015 Oct  
762 19];6(1):23–7. Available from:

- 763 <http://www.sciencedirect.com/science/article/pii/S1389945704001078>
- 764 49. Taheri S, Lin L, Austin D, Young T, Mignot E. Short sleep duration is associated with reduced  
765 leptin, elevated ghrelin, and increased body mass index. PLoS Med [Internet]. Public Library  
766 of Science; 2004 Dec 7 [cited 2015 Nov 1];1(3):e62. Available from:  
767 <http://journals.plos.org/plosmedicine/article?id=10.1371/journal.pmed.0010062>
- 768 50. Roberts RE, Shema SJ, Kaplan GA, Strawbridge WJ. Sleep Complaints and Depression in an  
769 Aging Cohort: A Prospective Perspective. Am J Psychiatry [Internet]. American Psychiatric  
770 Publishing; 2000 Jan 1 [cited 2015 Jun 16];157(1):81–8. Available from:  
771 <http://ajp.psychiatryonline.org/doi/10.1176/ajp.157.1.81>
- 772 51. Breslau N, Roth T, Rosenthal L, Andreski P. Sleep disturbance and psychiatric disorders: A  
773 longitudinal epidemiological study of young Adults. Biol Psychiatry [Internet]. 1996 Mar [cited  
774 2015 Apr 8];39(6):411–8. Available from:  
775 <http://www.sciencedirect.com/science/article/pii/0006322395001883>
- 776 52. Kaneita Y, Ohida T, Uchiyama M, Takemura S, Kawahara K, Yokoyama E, et al. The  
777 Relationship Between Depression and Sleep Disturbances: A Japanese Nationwide General  
778 Population Survey. J Clin Psychiatry [Internet]. 2006 Feb [cited 2015 Jun 16];67(2):196–203.  
779 Available from: <http://www.ncbi.nlm.nih.gov/pubmed/16566613>
- 780 53. Fried EI, Nesse RM. Depression sum-scores don't add up: why analyzing specific depression  
781 symptoms is essential. BMC Med [Internet]. 2015 Apr 6 [cited 2015 Apr 9];13(1):72. Available  
782 from: <http://www.biomedcentral.com/1741-7015/13/72>
- 783 54. Novati A, Hulshof HJ, Koolhaas JM, Lucassen PJ, Meerlo P. Chronic sleep restriction causes a  
784 decrease in hippocampal volume in adolescent rats, which is not explained by changes in  
785 glucocorticoid levels or neurogenesis. Neuroscience [Internet]. 2011 Sep 8 [cited 2015 Jan  
786 20];190:145–55. Available from:  
787 <http://www.sciencedirect.com/science/article/pii/S0306452211007111>
- 788 55. Ramsawh HJ, Stein MB, Belik S-L, Jacobi F, Sareen J. Relationship of anxiety disorders, sleep  
789 quality, and functional impairment in a community sample. J Psychiatr Res [Internet]. 2009  
790 Jul [cited 2015 Dec 7];43(10):926–33. Available from:  
791 <http://www.sciencedirect.com/science/article/pii/S0022395609000211>
- 792 56. Zigmond AS, Snaith RP. The hospital anxiety and depression scale. Acta Psychiatr Scand  
793 [Internet]. 1983 Jun [cited 2014 Jul 11];67(6):361–70. Available from:  
794 <http://www.ncbi.nlm.nih.gov/pubmed/6880820>
- 795 57. Wechsler CJ. Wechsler Memory Scale. 3d UK. London: Harcourt; 1999.
- 796 58. Cattell RB. Abilities: their structure, growth, and action. Boston: Houghton-Mifflin; 1971.
- 797 59. Hua K, Zhang J, Wakana S, Jiang H, Li X, Reich DS, et al. Tract probability maps in stereotaxic  
798 spaces: analyses of white matter anatomy and tract-specific quantification. Neuroimage.  
799 2008 Jan;39(1):336–47.
- 800 60. McGee DL, Liao Y, Cao G, Cooper RS. Self-reported Health Status and Mortality in a  
801 Multiethnic US Cohort. Am J Epidemiol [Internet]. 1999 Jan 1 [cited 2015 Nov 25];149(1):41–  
802 6. Available from: <http://aje.oxfordjournals.org/content/149/1/41.short>
- 803 61. Deurenberg P, Weststrate JA, Seidell JC. Body mass index as a measure of body fatness: age-  
804 and sex-specific prediction formulas. Br J Nutr [Internet]. Cambridge University Press; 2007  
805 Mar 9 [cited 2015 Oct 7];65(2):105. Available from:  
806 [http://journals.cambridge.org/abstract\\_S0007114591000193](http://journals.cambridge.org/abstract_S0007114591000193)

62. Liang F, Paulo R, Molina G, Clyde MA, Berger JO. Mixtures of g Priors for Bayesian Variable Selection. *J Am Stat Assoc* [Internet]. Taylor & Francis; 2008 Mar 1 [cited 2015 Oct 7];103(481):410–23. Available from: <http://amstat.tandfonline.com/doi/abs/10.1198/016214507000001337#.VhTxTPI3lpg>
63. Rouder JN, Morey RD. Default Bayes Factors for Model Selection in Regression. *Multivariate Behav Res* [Internet]. Taylor & Francis Group; 2012 Nov 17 [cited 2015 Jun 16];47(6):877–903. Available from: <http://www.tandfonline.com/doi/abs/10.1080/00273171.2012.734737>
64. Wagenmakers E-J. A practical solution to the pervasive problems of p values. *Psychon Bull Rev* [Internet]. 2007 Oct [cited 2015 Jun 16];14(5):779–804. Available from: <http://www.springerlink.com/index/10.3758/BF03194105>
65. Wetzels R, Matzke D, Lee MD, Rouder JN, Iverson GJ, Wagenmakers E-J. Statistical Evidence in Experimental Psychology: An Empirical Comparison Using 855 t Tests. *Perspect Psychol Sci* [Internet]. 2011 May 18 [cited 2015 May 12];6(3):291–8. Available from: <http://pps.sagepub.com/content/6/3/291.short>
66. Gelman A, Hill J, Yajima M. Why We (Usually) Don't Have to Worry About Multiple Comparisons. *J Res Educ Eff* [Internet]. Taylor & Francis Group; 2012 Apr 3 [cited 2014 Jul 15];5(2):189–211. Available from: <http://www.tandfonline.com/doi/abs/10.1080/19345747.2011.618213>
67. Jeffreys H. *A theory of probability*. Oxford: Oxford University Press; 1961.
68. Morey RD, Rouder JN. *BayesFactor*. CRAN; 2015.
69. Team. R: a language and environment for statistical computing. Vienna; 2013.
70. Jeffreys H. *Theory of Probability*. Oxford: Oxford University Press; 1961.
71. Linzer DA, Lewis JB. *polCA: An R Package for Polytomous Variable Latent Class Analysis* [Internet]. *Journal of Statistical Software*. 2011 [cited 2014 Sep 8]. p. 42: 10. Available from: <http://www.jstatsoft.org/v42/i10/paper>
72. Rhemtulla M, Brosseau-Liard PÉ, Savalei V. When can categorical variables be treated as continuous? A comparison of robust continuous and categorical SEM estimation methods under suboptimal conditions. *Psychol Methods* [Internet]. American Psychological Association; 2012 [cited 2017 Feb 10];17(3):354–73. Available from: <http://doi.apa.org/getdoi.cfm?doi=10.1037/a0029315>
73. Schwarz G. Estimating the Dimension of a Model. *Ann Stat* [Internet]. Institute of Mathematical Statistics; 1978 Mar 1 [cited 2015 Jun 16];6(2):461–4. Available from: <http://projecteuclid.org/euclid.aos/1176344136>
74. Dayton CM, Macready GB. Concomitant-Variable Latent-Class Models. *J Am Stat Assoc* [Internet]. Taylor & Francis; 1988 Mar [cited 2014 Sep 8];83(401):173–8. Available from: <http://www.tandfonline.com/doi/abs/10.1080/01621459.1988.10478584>
75. Wickham H. *ggplot2: Elegant Graphics for Data Analysis* [Internet]. Springer Science & Business Media; 2009 [cited 2015 Aug 4]. 221 p. Available from: <https://books.google.com/books?hl=en&lr=&id=bes-AAAAQBAJ&pgis=1>
76. Miller E. Verbal fluency as a function of a measure of verbal intelligence and in relation to different types of cerebral pathology. *Br J Clin Psychol* [Internet]. 1984 Feb 12 [cited 2016 Jan 7];23(1):53–7. Available from: <http://doi.wiley.com/10.1111/j.2044-8260.1984.tb00626.x>
77. Biesbroek JM, van Zandvoort MJE, Kappelle LJ, Velthuis BK, Biessels GJ, Postma A. Shared and distinct anatomical correlates of semantic and phonemic fluency revealed by lesion-symptom

- 851 mapping in patients with ischemic stroke. *Brain Struct Funct* [Internet]. Springer Berlin  
852 Heidelberg; 2016 May 5 [cited 2017 Jan 31];221(4):2123–34. Available from:  
853 <http://link.springer.com/10.1007/s00429-015-1033-8>
- 854 78. Troyer AK, Moscovitch M, Winocur G. Clustering and switching as two components of verbal  
855 fluency: Evidence from younger and older healthy adults. *Neuropsychology* [Internet]. 1997  
856 [cited 2016 Jan 7];11(1). Available from: <http://psycnet.apa.orgjournals/neu/11/1/138>
- 857 79. Kievit RA, Davis SW, Griffiths JD, Correia MM, Henson RNA. A watershed model of individual  
858 differences in fluid intelligence. *bioRxiv* [Internet]. Cold Spring Harbor Labs Journals; 2016 Feb  
859 26 [cited 2016 Mar 29];41368. Available from:  
860 <http://www.biorxiv.org/content/early/2016/02/26/041368.abstract>
- 861 80. Briones B, Adams N, Strauss M, Rosenberg C, Whalen C, Carskadon M, et al. Relationship  
862 between sleepiness and general health status. *Sleep* [Internet]. 1996 Sep [cited 2015 Aug  
863 4];19(7):583–8. Available from: <http://www.ncbi.nlm.nih.gov/pubmed/8899938>
- 864 81. Cizza G, Skarulis M, Mignot E. A link between short sleep and obesity : Building the evidence  
865 for causation. *Sleep* [Internet]. American Academy of Sleep Medicine; 2005 [cited 2016 Jan  
866 12];28(10):1217–20. Available from: <http://cat.inist.fr/?aModele=afficheN&cpsidt=17179376>
- 867 82. Gangwisch JE, Malaspina D, Boden-Albala B, Heymsfield SB. Inadequate sleep as a risk factor  
868 for obesity: analyses of the NHANES I. *Sleep* [Internet]. 2005 Oct [cited 2015 Sep  
869 3];28(10):1289–96. Available from: <http://europepmc.org/abstract/med/16295214>
- 870 83. Grandner MA, Drummond SPA. Who are the long sleepers? Towards an understanding of the  
871 mortality relationship. *Sleep Med Rev*. 2007;11(5):341–60.
- 872 84. KANEITA Y, UCHIYAMA M, YOSHIIKE N, OHIDA T. Associations of Usual Sleep Duration with  
873 Serum Lipid and Lipoprotein Levels. *Sleep*. American Academy of Sleep Medicine; 31(5):645–  
874 52.
- 875 85. Grandner MA, Hale L, Moore M, Patel NP. Mortality associated with short sleep duration: The  
876 evidence, the possible mechanisms, and the future. *Sleep Med Rev*. 2010;14(3):191–203.
- 877 86. Kievit RA, Davis SW, Mitchell D, Taylor JR, Duncan J, Cam-CAN, et al. Distinct aspects of  
878 frontal lobe structure mediate age-related differences in fluid intelligence and multitasking.  
879 *Nat Commun*. 2014;
- 880 87. Henson RN, Campbell KL, Davis SW, Taylor JR, Emery T, Erzinclioğlu S, et al. Multiple  
881 determinants of lifespan memory differences. *Sci Rep* [Internet]. Nature Publishing Group;  
882 2016 Sep 7 [cited 2017 Feb 10];6:32527. Available from:  
883 <http://www.nature.com/articles/srep32527>
- 884 88. Fox RJ, Sakaie K, Lee J-C, Debbins JP, Liu Y, Arnold DL, et al. A validation study of multicenter  
885 diffusion tensor imaging: reliability of fractional anisotropy and diffusivity values. *AJNR Am J*  
886 *Neuroradiol* [Internet]. American Society of Neuroradiology; 2012 Apr [cited 2017 Feb  
887 10];33(4):695–700. Available from: <http://www.ncbi.nlm.nih.gov/pubmed/22173748>
- 888 89. Wandell BA. Clarifying Human White Matter. *Annu Rev Neurosci* [Internet]. Annual Reviews ;  
889 2016 Jul 8 [cited 2017 Feb 10];39(1):103–28. Available from:  
890 <http://www.annualreviews.org/doi/10.1146/annurev-neuro-070815-013815>
- 891 90. Tournier J-D, Mori S, Leemans A. Diffusion tensor imaging and beyond. *Magn Reson Med*  
892 [Internet]. Wiley Subscription Services, Inc., A Wiley Company; 2011 Jun [cited 2017 Feb  
893 10];65(6):1532–56. Available from: <http://doi.wiley.com/10.1002/mrm.22924>
- 894 91. Lustberg L, Reynolds CF. Depression and insomnia: questions of cause and effect. *Sleep Med*



- 895 Rev [Internet]. 2000 Jun [cited 2015 Dec 28];4(3):253–62. Available from:  
896 <http://www.sciencedirect.com/science/article/pii/S1087079299900758>
- 897 92. Sbarra DA, Allen JJB. Decomposing depression: On the prospective and reciprocal dynamics of  
898 mood and sleep disturbances.
- 899 93. Lim ASP, Ellison BA, Wang JL, Yu L, Schneider JA, Buchman AS, et al. Sleep is related to neuron  
900 numbers in the ventrolateral preoptic/intermediate nucleus in older adults with and without  
901 Alzheimer’s disease. Brain [Internet]. 2014 Oct 20 [cited 2015 Dec 16];137(Pt 10):2847–61.  
902 Available from: <http://brain.oxfordjournals.org/content/early/2014/08/11/brain.awu222>
- 903 94. Raz N, Lindenberger U. Only time will tell: Cross-sectional studies offer no solution to the  
904 age–brain–cognition triangle: Comment on Salthouse (2011).
- 905 95. Schaie KW. The course of adult intellectual development.
- 906 96. Wiberg M, Sundstrom A. A Comparison of Two Approaches to Correction of Restriction of  
907 Range in Correlation Analysis. Pract Assessment, Res Eval [Internet]. Dr. Lawrence M. Rudner.  
908 e-mail: [editor@pareonline.net](mailto:editor@pareonline.net); Web site: <http://pareonline.net>; 2009 Feb 28 [cited 2016 Feb  
909 19];14(5). Available from: <http://eric.ed.gov/?id=EJ933658>
- 910

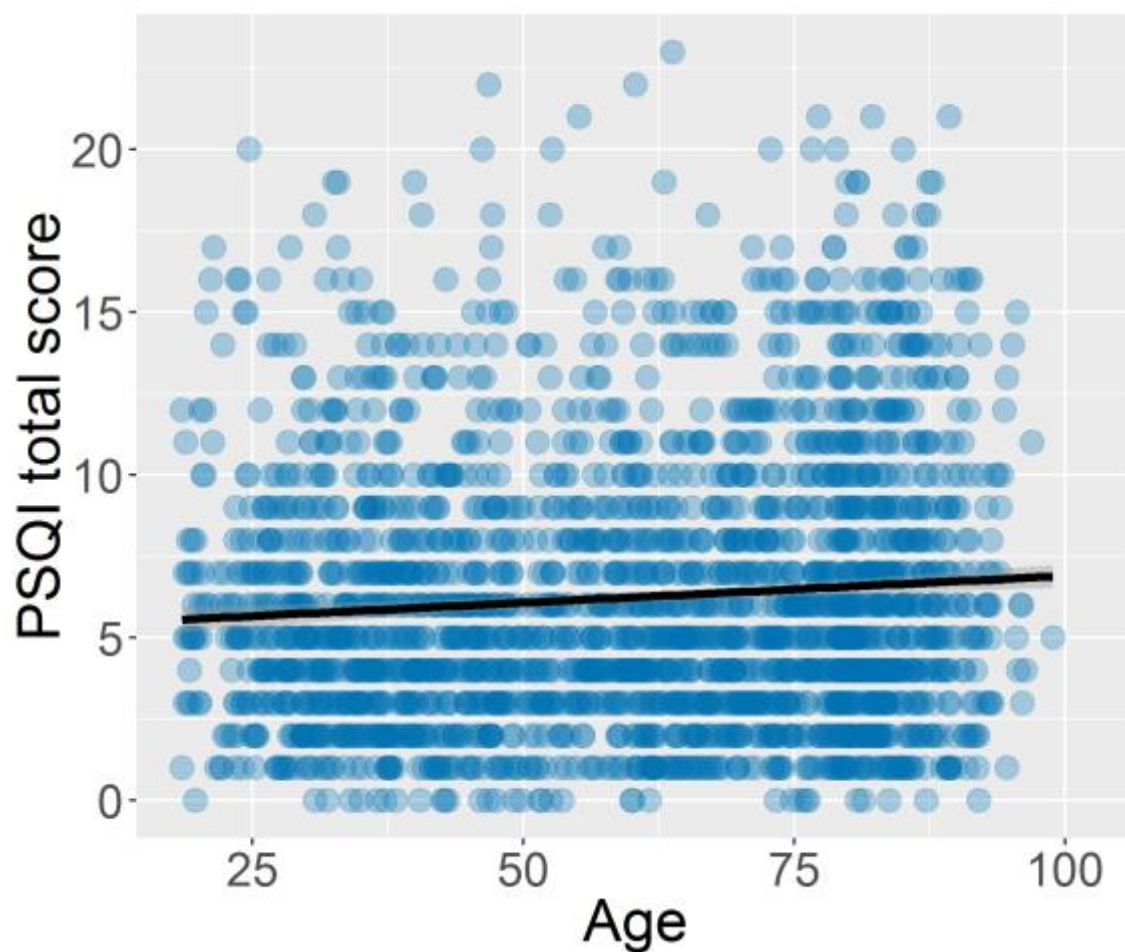

Supplementary Figure 1.

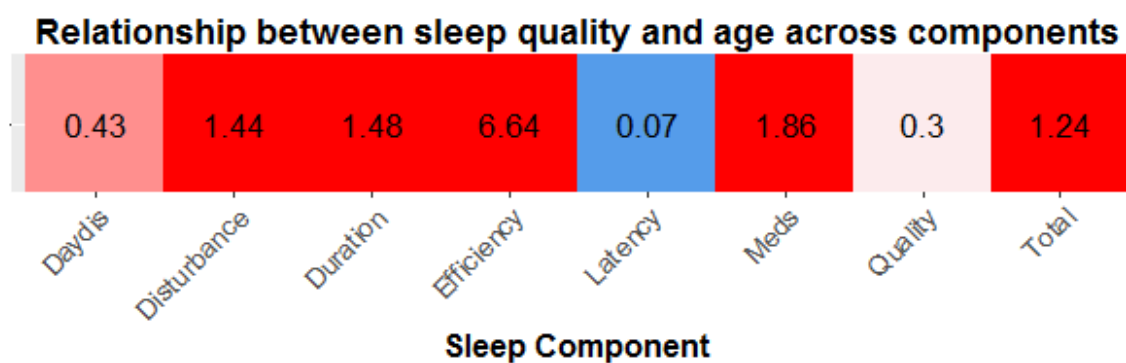

Supplementary Figure 2.

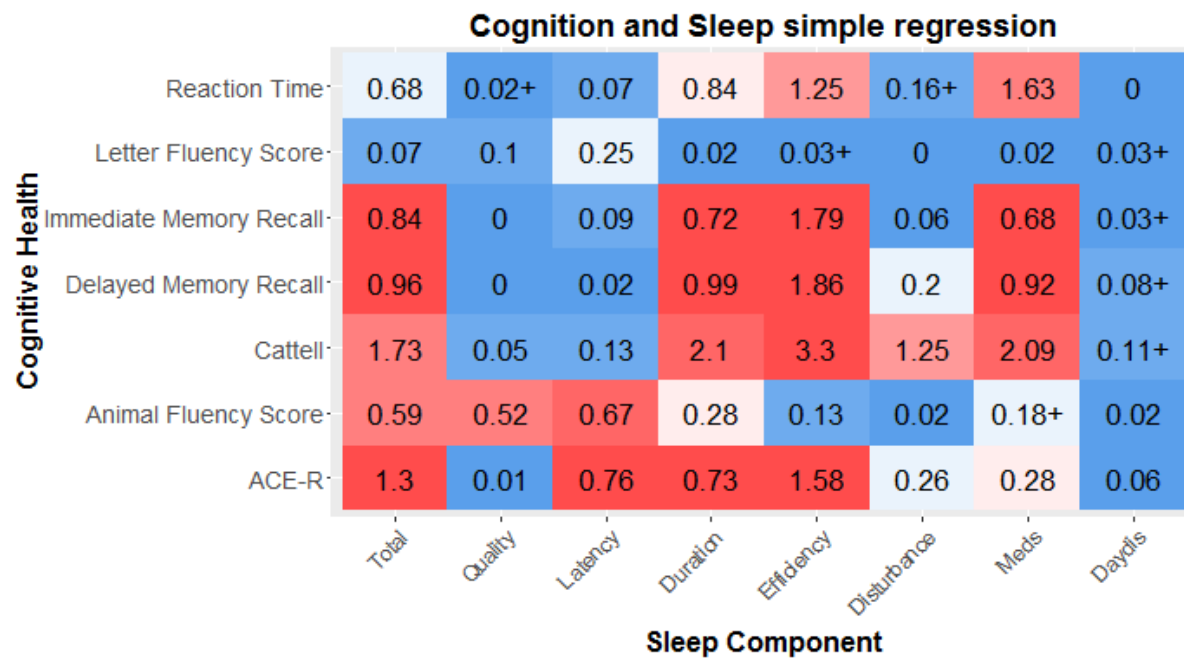

Supplementary Figure 3.

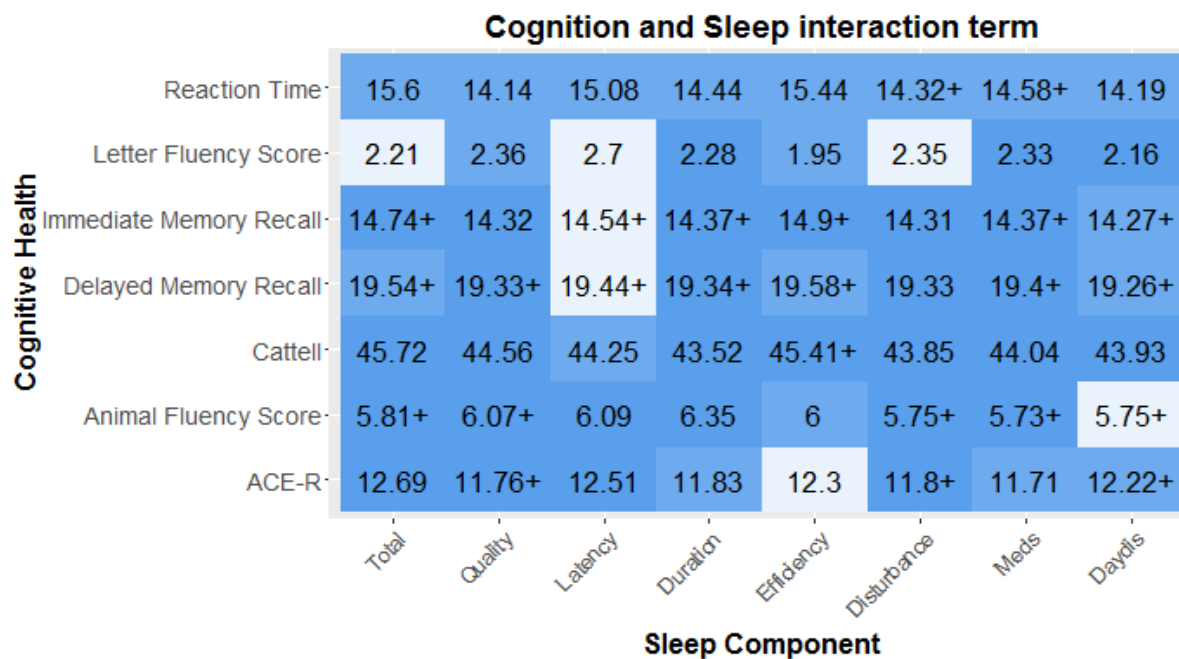

Supplementary Figure 4.



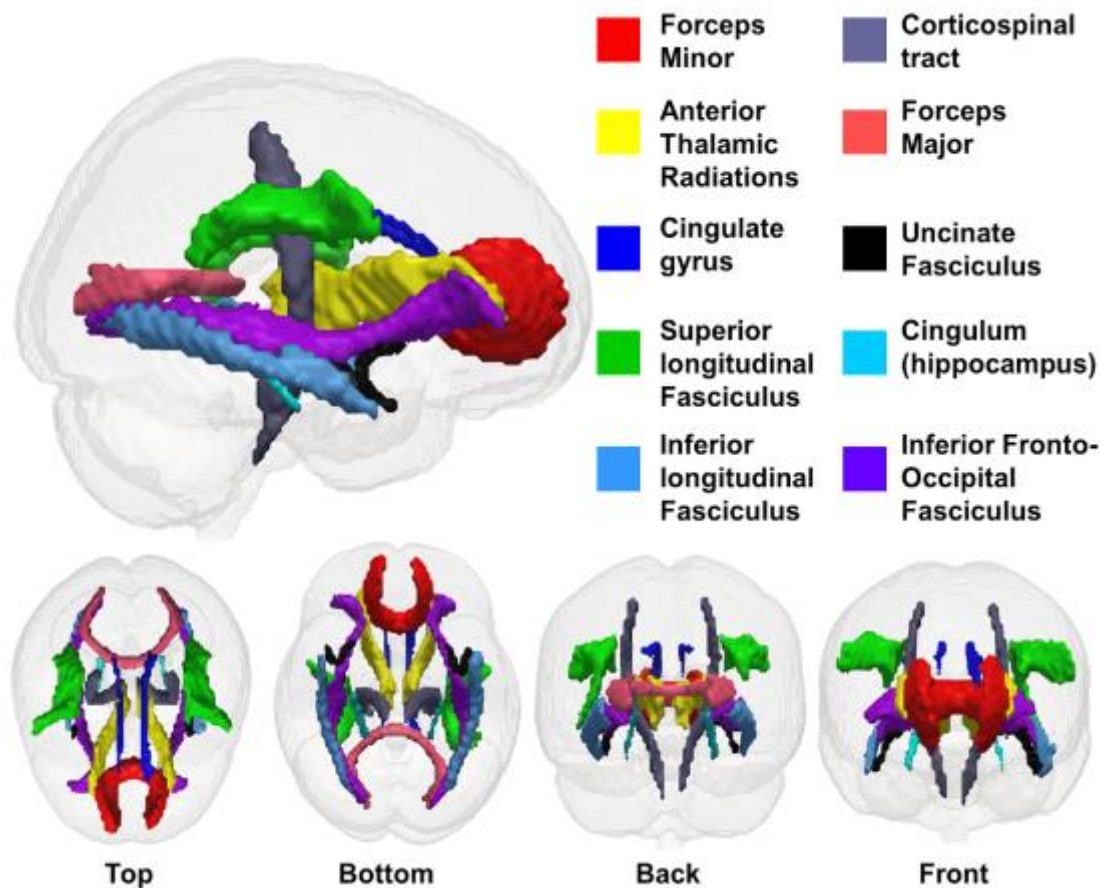

Supplementary Figure 5.

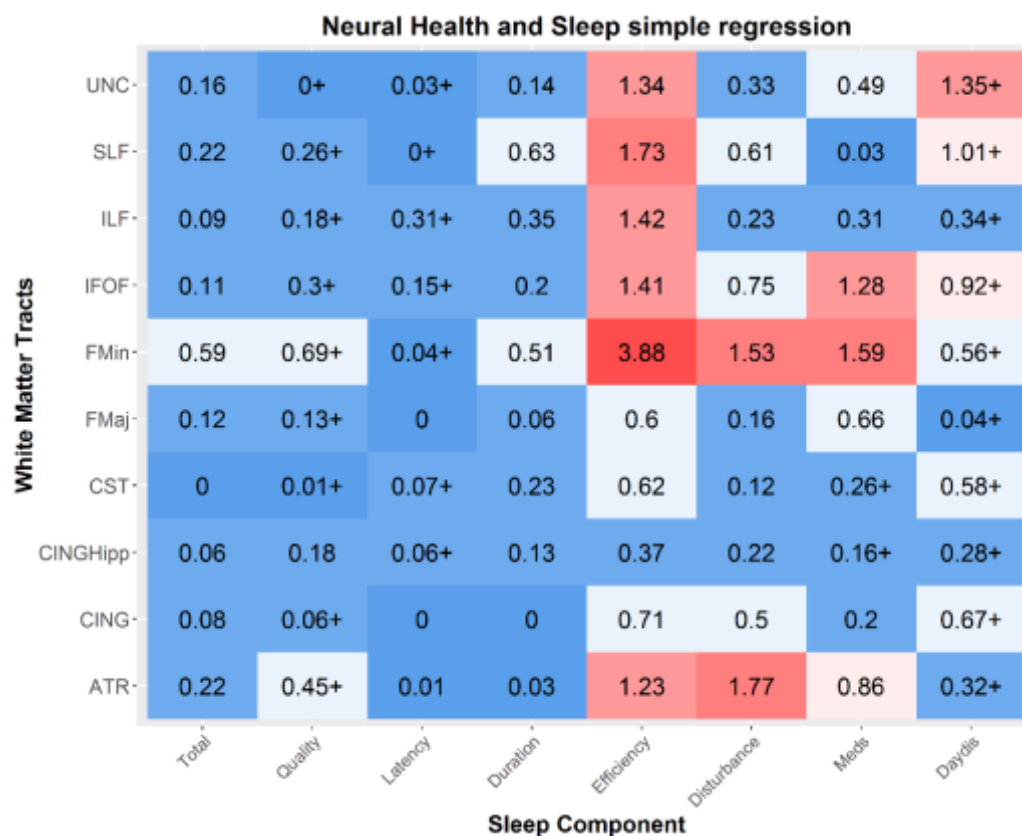

Supplementary Figure 6.

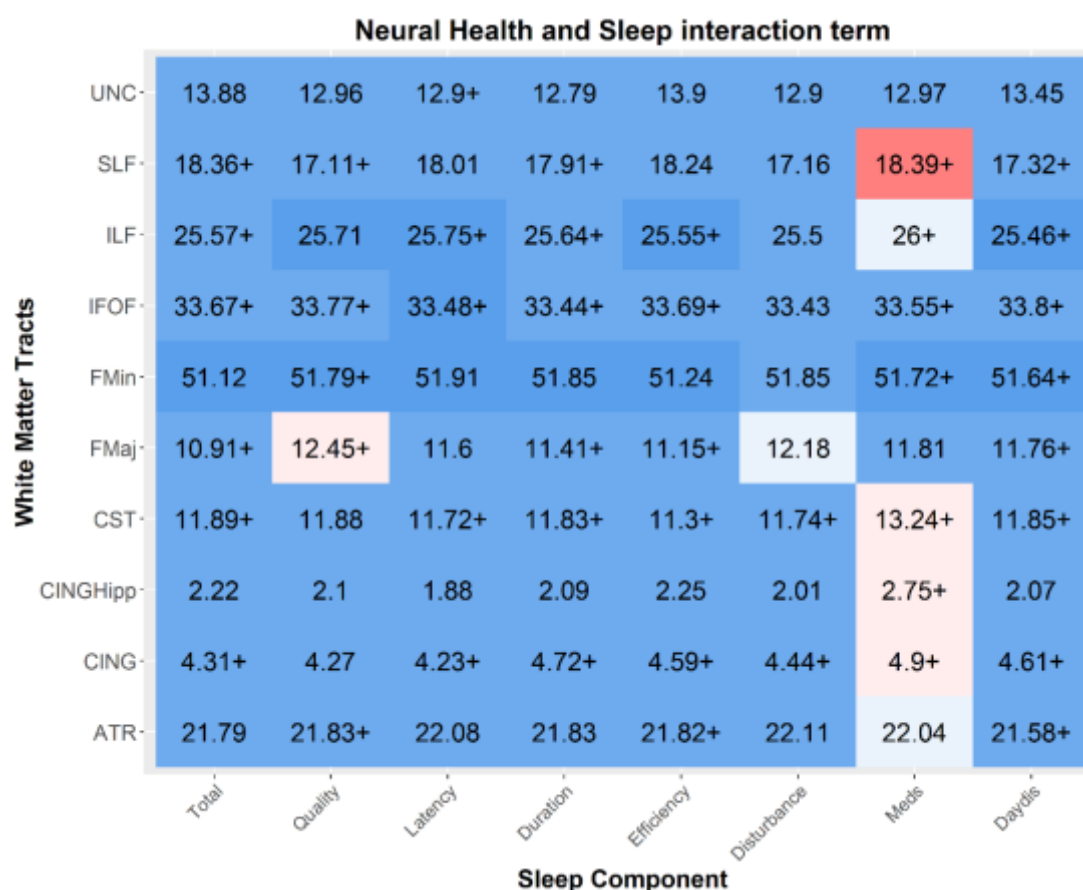

Supplementary Figure 7.

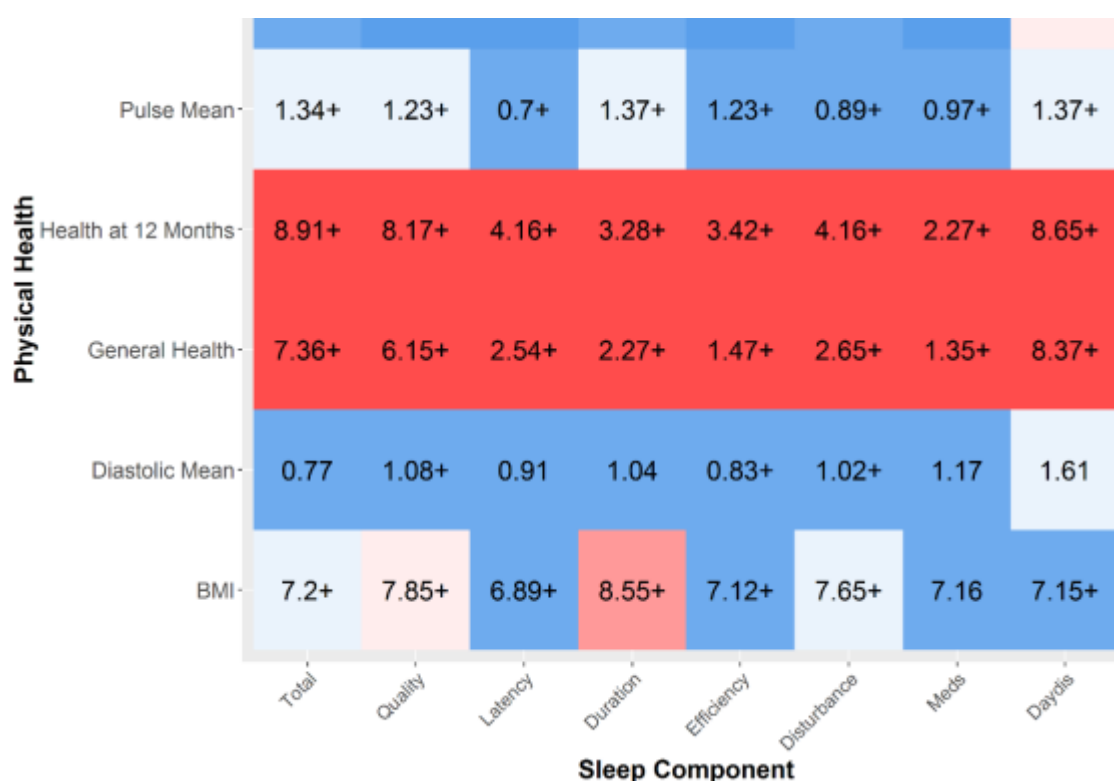

Supplementary Figure 8.

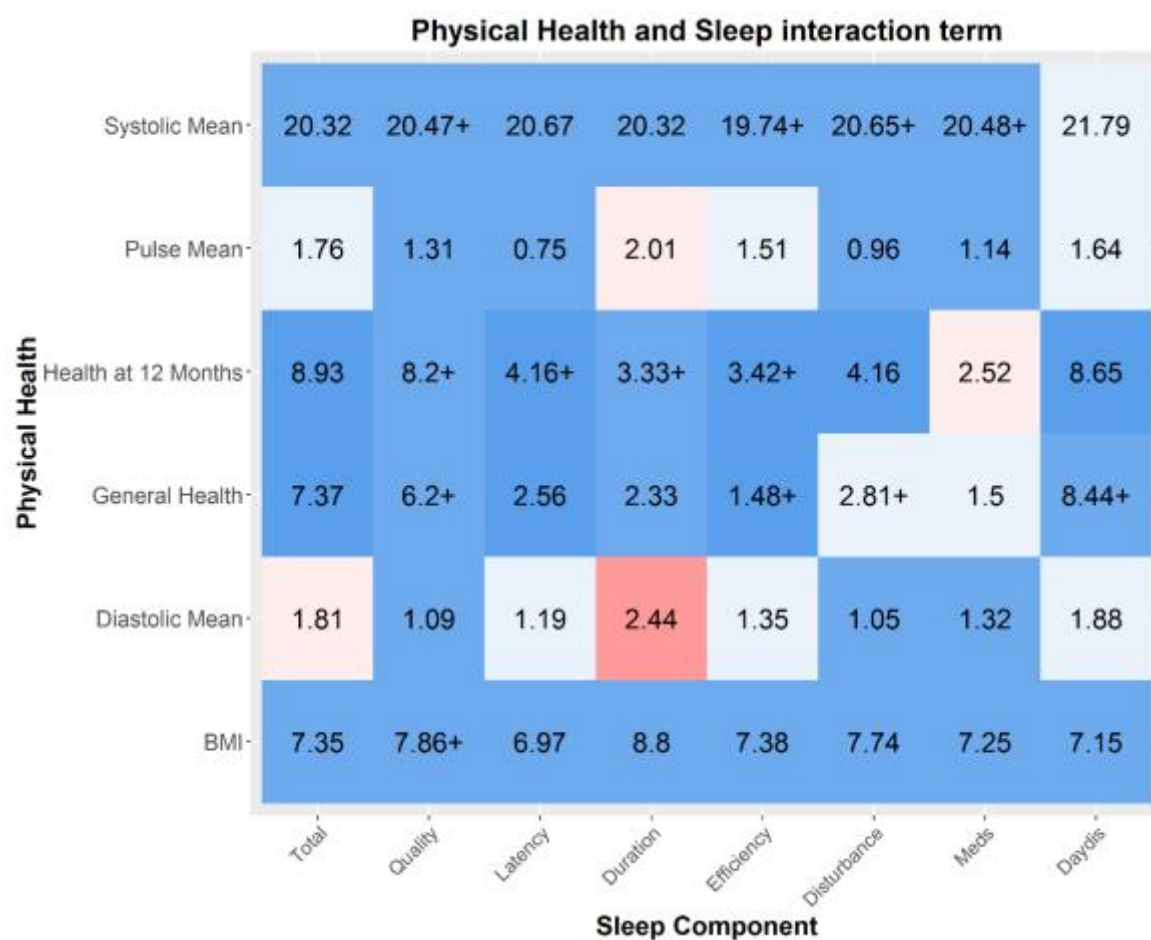

Supplementary Figure 9.

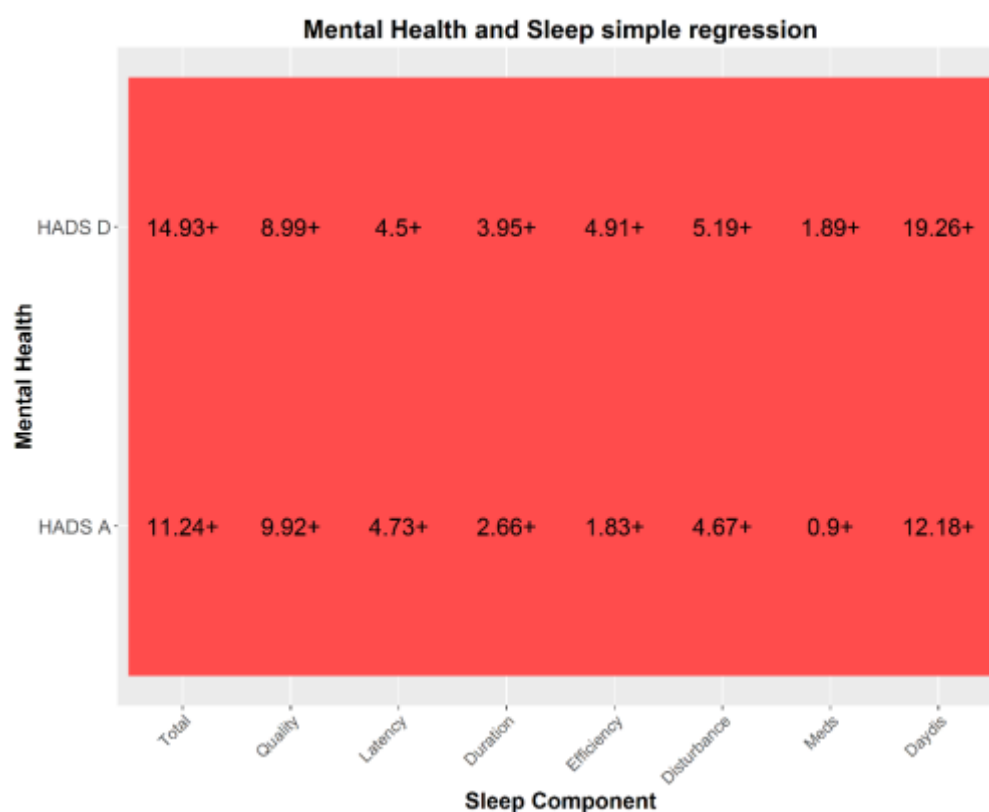

Supplementary Figure 10.

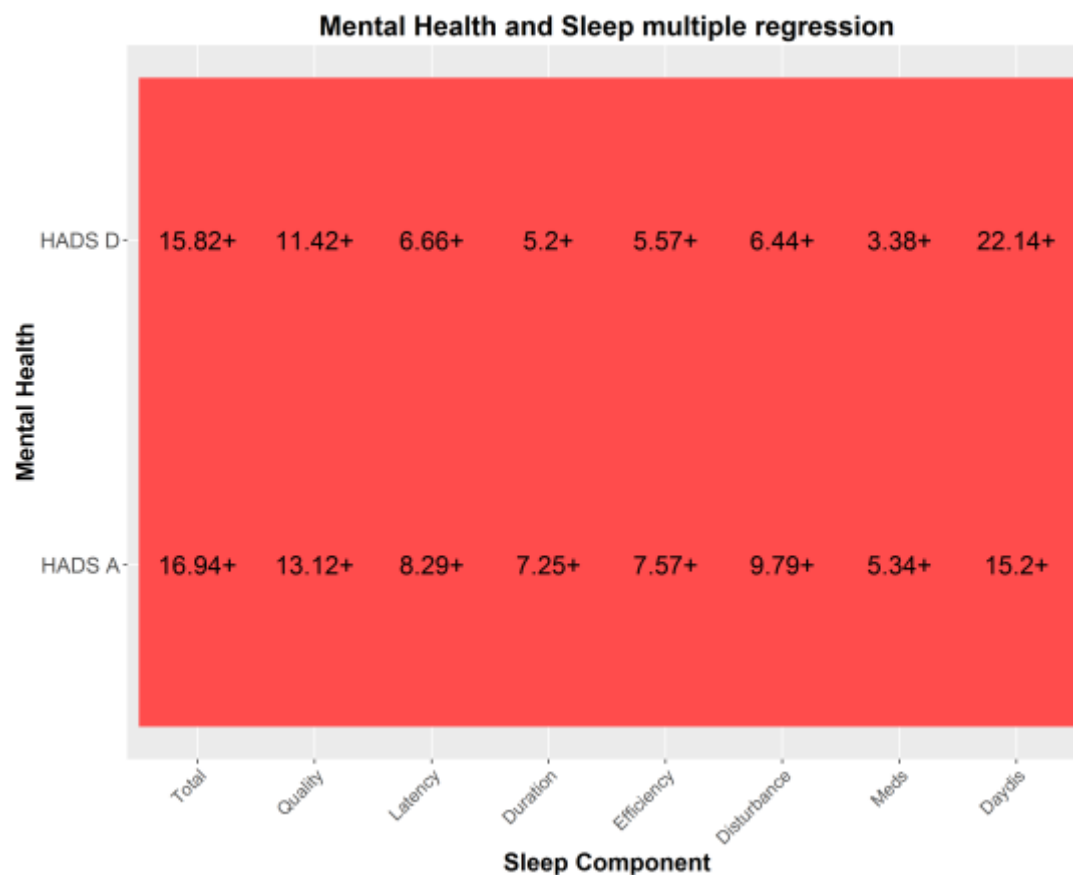

Supplementary Figure 11.

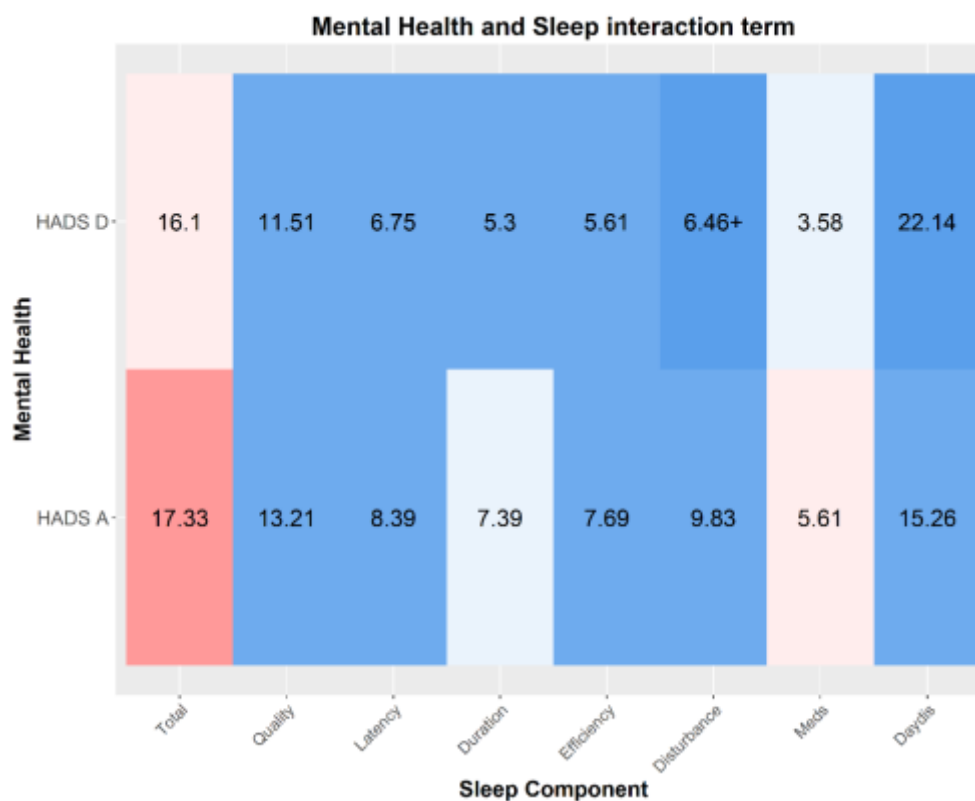

Supplementary Figure 12.
